# Supplementary material
Source: PubMed Central journal article supplement (PMC5501412)
Supplement: NIHMS862055-supplement-Corrected_Supplemental_Materials.pdf [file NIHMS862055-supplement-Corrected_Supplemental_Materials.pdf]

# SUPPLEMENTAL MATERIAL

## Defined Engineered Human Myocardium with Advanced Maturation for Applications in Heart Failure Modelling and Repair

**Authors:** Malte Tiburcy, MD<sup>1,2</sup>; James E. Hudson, PhD<sup>1,2\*</sup>; Paul Balfanz<sup>1,2</sup>; Susanne Schlick, MS<sup>1,2</sup>; Tim Meyer, PhD<sup>1,2</sup>; Mei-Ling Chang Liao, PhD<sup>1,2</sup>; Elif Levent, PhD<sup>1,2</sup>; Farah Raad, PhD<sup>1,2</sup>; Sebastian Zeidler, PhD<sup>1,2,3</sup>; Edgar Wingender, PhD<sup>2,3</sup>; Johannes Riegler, PhD<sup>4</sup>; Mouer Wang, MD<sup>4</sup>; Joseph D. Gold, PhD<sup>4,5</sup>; Izhak Kehat, MD PhD<sup>6</sup>; Erich Wettwer, PhD<sup>1,7</sup>; Ursula Ravens, MD PhD<sup>7</sup>; Pieterjan Dierickx, PhD<sup>8</sup>; Linda W. van Laake, MD PhD<sup>8</sup>; Marie Jose Goumans, PhD<sup>9</sup>; Sara Khadjeh, PhD<sup>10</sup>; Karl Toischer, MD<sup>10</sup>; Gerd Hasenfuss, MD<sup>10</sup>; Larry A. Couture, PhD<sup>11</sup>; Andreas Unger, PhD<sup>12</sup>; Wolfgang A. Linke, PhD<sup>2,10,12</sup>; Toshiyuki Araki, PhD<sup>13</sup>; Benjamin Neel, MD PhD<sup>13</sup>; Gordon Keller, PhD<sup>14</sup>; Lior Gepstein, MD PhD<sup>6</sup>; Joseph C. Wu, MD PhD<sup>4,5</sup>; Wolfram-Hubertus Zimmermann, MD<sup>1,2</sup>

**Affiliations:** <sup>1</sup>Institute of Pharmacology and Toxicology, University Medical Center Goettingen, Goettingen, Germany. <sup>2</sup>German Center for Cardiovascular Research (DZHK), partner site Goettingen, Goettingen, Germany. <sup>3</sup>Institute of Bioinformatics, University Medical Center Goettingen, Goettingen, Germany. <sup>4</sup>Stanford Cardiovascular Institute and <sup>5</sup>Department of Radiology, Molecular Imaging Program, Stanford University School of Medicine, Stanford, CA, USA. <sup>6</sup>The Sohnis Laboratory for Cardiac Electrophysiology and Regenerative Medicine, Technion-Israel Institute of Technology, Haifa, Israel. <sup>7</sup>Institute of Pharmacology and Toxicology, Technical University Dresden, Dresden, Germany. <sup>8</sup>University Medical Center Utrecht and Hubrecht Institute, Utrecht, The Netherlands. <sup>9</sup>Leiden University Medical Center, Leiden, The Netherlands. <sup>10</sup>Clinic for Cardiology and Pneumology, University Medical Center Goettingen, Goettingen, Germany. <sup>11</sup>Center for Applied Technology, Beckman Research Institute, City of Hope, Duarte, CA, USA. <sup>12</sup>Department of Cardiovascular Physiology, Institute of Physiology, Ruhr University Bochum, Bochum, Germany. <sup>13</sup>New Laura and Isaac Perlmutter Cancer Center at New York University Langone, New York. <sup>14</sup>McEwen Centre for Regenerative Medicine, Toronto, Canada.

\*Present address: Laboratory for Cardiac Regeneration, School of Biomedical Sciences, The University of Queensland, Australia

### Corresponding author:

Wolfram-Hubertus Zimmermann, M.D.  
Institute of Pharmacology and Toxicology  
University Medical Center Goettingen  
Georg-August-University  
Robert-Koch-Str. 40  
37075 Goettingen  
Germany  
Tel: +49-551-39-5781; Fax: +49-551-39-5699  
Email: [w.zimmermann@med.uni-goettingen.de](mailto:w.zimmermann@med.uni-goettingen.de)

Supplemental Methods

Supplemental Tables 1-5

Supplemental Figures 1-11

Supplemental References

Supplemental Video Legends

## Supplemental methods

**EHM - Starting Protocol.** First, a suspension of differentiated single cells was prepared: (1) EBs were digested with collagenase B (Roche, 1 mg/ml; H9.2), collagenase I (Sigma-Aldrich, 2 mg/ml) and/or trypsin/EDTA (Life Technologies, 0.25%/1 mmol/l; HES3, HES3-ENVY, HES2, hiPS-BJ) as described elsewhere<sup>1-6</sup>; (2) monolayers (hES2-RFP, hiPS-G1) were digested with Accutase (Millipore), 0.0125% Trypsin (Life Technologies), and 20 µg/ml DNase (Calbiochem) for 10-15 mins at room temperature; and (3) human fibroblasts were dispersed using TrypLE (Life Technologies). Fibroblast culture was in DMEM with 4.5 g/l glucose, 15% fetal bovine serum, 100 U/ml penicillin, and 100 µg/ml streptomycin (all Life Technologies). Where indicated fibroblast were transduced with a lentivirus (pGIPZ, Addgene) for stable expression of GFP under the control of a ubiquitously active CMV promotor.

Freshly dispersed cells were counted using the electrical current exclusion method (CASY, Roche) before proceeding with EHM construction, using a modification of our original engineered heart tissue protocol<sup>7</sup>. Briefly, EHMs (reconstitution volume: 500 µl) were prepared by pipetting a mixture containing freshly dispersed ESC-derivatives ( $1 \times 10^4$ - $15 \times 10^6$  cells in Iscove-Medium with 20% fetal bovine serum, 1% non-essential amino acids, 2 mmol/l glutamine, 100 µmol/l β-mercaptoethanol, 100 U/ml penicillin, and 100 µg/ml streptomycin) with or without addition of fibroblasts as indicated, pH-neutralized collagen type I from rat tails (0.4 mg/EHM), Matrigel<sup>TM</sup> (10% v/v; Becton Dickenson), and concentrated serum-containing culture medium (2x DMEM, 20% horse serum, 4% chick embryo extract, 200 U/ml penicillin, and 200 µg/ml streptomycin) in circular molds

(inner/outer diameter: 2/4 mm; height: 5 mm - Starting Protocol, **Table 1**). EHM condensed quickly within the casting molds and were transferred onto static or dynamic stretch devices (110% of slack length)<sup>8-10</sup> on culture day 3. Medium was exchanged every other day.

**Definition of the EHM reconstitution and culture protocol towards cGMP.** Initially, cells were reconstituted in a mixture of pH-neutralized medical grade bovine collagen (LLC Collagen Solutions, 0.4 mg/EHM), concentrated serum-containing culture medium (2x DMEM, 40% fetal calf serum, 200 U/ml penicillin, and 200 µg/ml streptomycin) and cultured in Iscove-Medium with 20% fetal calf serum, 1% non-essential amino acids, 2 mmol/l glutamine, 300 µmol/l ascorbic acid, 100 µmol/l β-mercaptoethanol, 100 U/ml penicillin, and 100 µg/ml streptomycin (Matrix Protocol, **Table 1**).

To generate defined, serum-free EHM, cells were reconstituted in a mixture of pH-neutralized medical grade bovine collagen (LLC Collagen Solutions, 0.4 mg/EHM), concentrated serum-free medium (2x RPMI, 8% B27 without insulin, 200 U/ml penicillin, and 200 µg/ml streptomycin) and cultured in Iscove-Medium with 4% B27 without insulin, 1% non-essential amino acids, 2 mmol/l glutamine, 300 µmol/l ascorbic acid, 100 ng/ml IGF1 (AF-100-11), 10 ng/ml FGF-2 (AF-100-18B), 5 ng/ml VEGF<sub>165</sub> (AF-100-20), 5 ng/ml TGF-β1 (AF-100-21C; mandatory during culture days 0-3), 100 U/ml penicillin, and 100 µg/ml streptomycin (Serum-free Protocol, **Table 1**). All growth factors were purchased from Peprotech as "animal-free recombinant human growth factors". Where indicated full B27 (Life Technologies, A1486701) was compared to B27 without antioxidants (Life Technologies, #10889038) and B27 without insulin (Life Technologies, #0050129SA).

**Action potential recordings.** We recorded spontaneous action potentials (APs) from individual cardiomyocytes in EHMs via conventional intracellular glass microelectrodes filled with 2.5 mol/l KCl in thermostatted (37°C) and pH-controlled (pH 7.4 under 5% O<sub>2</sub> and 95%

CO<sub>2</sub>) extracellular solution (mmol/l: 126.7 NaCl, 5.4 KCl, 1.8 CaCl<sub>2</sub>, 1.05 MgCl<sub>2</sub>, 22 NaHCO<sub>3</sub>, 0.42 NaH<sub>2</sub>PO<sub>4</sub>, 11 glucose).

**Flow cytometry.** Single cell suspensions were analysed either alive or fixed in 70% ice cold ethanol or 4% formaldehyde (Histofix, Roth). For live cell analysis, cells were incubated for 10 min in Sytox Red Dead Cell Stain (Life Technologies, 5 nmol/L) to exclude dead cells and Hoechst-3342 (Life Technologies, 10 µg/ml) to analyse nuclear DNA content and exclude cell doublets. The following gating strategy was applied: (1) gating of cells based on forward scatter area (FSC-A) and sideward scatter area (SSC-A), (2) gating of live cells (Sytox Red negative), (3) gating of single cells (based on DNA signal width), (4) gating of RFP-positive cells (cardiomyocytes), and (5) assessment of cardiomyocyte size based on median SSC-A or median RFP fluorescence intensity. Cardiomyocyte size measurements by flow cytometry were validated against morphometric measurements of cell area in microscopic images of identical samples using ImageJ software (**Supplementary Figure 9**).

Fixed cells were stained with Hoechst-3342 (Life Technologies, 10 µg/ml) to analyse nuclear DNA content and to exclude cell doublets.

The following flow cytometry parameters were established for the factorial screen (**Supplementary Figure 3**): (1) cell viability (100% minus percentage of cells in the sub-G1 DNA fraction), (2) cardiomyocyte and non-myocyte percentage (actinin-positive and -negative cells, respectively), (3) cardiomyocyte median actinin fluorescence intensity (MFI, as a quantitative surrogate for cardiomyocyte sarcomere content), (4) cardiomyocyte, and (5) non-myocyte size (based on median SSC-A). Refer to **Supplementary Table 2** for details on antibodies utilized in this study. Cells were run on a LSRII SORP Cytometer (BD Biosciences) and analysed using DIVA or Cyflogic software. At least 10,000 events were analysed per sample.

**Immunofluorescence staining.** EHM-derived cells or 2D monolayer cardiomyocytes were fixed in 4% formaldehyde (Histofix, Roth). After 3 washes with PBS, cells were incubated with primary antibodies in PBS, 5% goat serum (Thermo Scientific), 1% bovine serum albumin, 0.5% Triton-X (both Sigma-Aldrich) for 2 hours at room temperature or overnight at 4°C. The antibodies used in this study are summarized in **Supplementary Table 2**. After several washes, appropriate secondary antibodies and Hoechst-33342 (Life Technologies, 10 µg/ml) to detect nuclear DNA were added for 1 hour at room temperature. Where indicated Alexa Fluor coupled phalloidin (Thermo Scientific) to stain f-actin was added (1:60 dilution). Immunostainings were imaged using a Zeiss LSM710 confocal microscope<sup>11</sup>. For sarcomere length measurements individual cardiomyocytes were semi-automatically analyzed using a custom-made Matlab (version 2014b) script. Briefly, individual actinin-stained sarcomeres were interactively traced using `impoly` command. Intensity values of the resulting pixel trace were smoothed (5 pixel moving average) and Z-bands were identified by the `findpeaks` command with a manually adjustable `MinPeakProminence` Parameter (default 50 for 8 bit images). Pixel X and Y indices were scaled to their respective physical length and converted to positions along the trace line by cumulatively summing the norms of vectors connecting neighboring pixel.

## Supplemental Tables

### Supplementary Table 1

| PSC line              | Cardiomyocyte differentiation              | Input cells/500 $\mu$ l EHM | Contractions (defined areas / whole construct)           | Experimental data                                                                  |
|-----------------------|--------------------------------------------|-----------------------------|----------------------------------------------------------|------------------------------------------------------------------------------------|
| H9.2                  | Spontaneous, EB; Kehat et al. <sup>2</sup> | 10,000                      | local: 2-3 days after casting / whole: not observed      | n.a.                                                                               |
| H9.2                  |                                            | 250,000                     | local: 2-3 days after casting / whole: not observed      | n.a.                                                                               |
| HES3-ENVY             | Spontaneous, EB; ESI <sup>1</sup>          | 10,000                      | local: 2 days after casting / whole: not observed        | n.a.                                                                               |
| HES3-ENVY             |                                            | 100,000                     | local: 2 days after casting / whole: not observed        | n.a.                                                                               |
| HES3-ENVY             |                                            | 250,000                     | local: 1-2 days after casting / whole: not observed      | n.a.                                                                               |
| HES3-ENVY             |                                            | 1.5x10 <sup>6</sup>         | local: 1 day after casting / whole: 3 days after casting | Figure 2f                                                                          |
| HES3-ENVY             |                                            | 15x10 <sup>6</sup>          | local: 1 day after casting / whole: 3 days after casting | n.a.                                                                               |
| HES3                  | Spontaneous, EB; ESI <sup>1</sup>          | 1.5x10 <sup>6</sup>         | local: 1 day after casting / whole: 3 days after casting | n.a.                                                                               |
| HES2                  | Directed, EB; Yang et al. <sup>5</sup>     | 1.5x10 <sup>6</sup>         | local: 1 day after casting / whole: 3 days after casting | Figure 1b<br>Suppl. Fig. 1f, 3d                                                    |
| HES2-RFP              | Directed, monolayer; refer to methods      | 1.5x10 <sup>6</sup>         | local: 1 day after casting / whole: 3 days after casting | Figure 1a-e, 2c,f, 3a-f, 4a-g<br>Suppl. Fig. 1a-f, 2a-d, 3, 4a, 5, 6, 7, 8, 9b, 10 |
| hiPS-G1               | Directed, monolayer; refer to methods      | 1.5x10 <sup>6</sup>         | local: 1 day after casting / whole: 3 days after casting | Figure 1f, 2a-e, 3a,b<br>Suppl. Fig. 4b,c, 5, 7b, 9a,b                             |
| H7                    | Directed, EB; Riegler et al. <sup>6</sup>  | 1.5x10 <sup>6</sup>         | local: 1 day after casting / whole: 3 days after casting | Figure 1f, 5b-g<br>Suppl. Figure 1f, 10                                            |
| hiPS-BJ               | Directed, EB, Yang et al. <sup>5</sup>     | 1.5x10 <sup>6</sup>         | local: 1 day after casting / whole: 3 days after casting | Figure 1b                                                                          |
| iCell <sup>®</sup> CM | CDI-undisclosed                            | 1.5x10 <sup>6</sup>         | local: 1 day after casting / whole: 3 days after casting | Figure 1f, 3a,b<br>Suppl. Video 2                                                  |

**Supplementary Table 1: Overview of EHM generation from various pluripotent stem cell lines.** n.a.: not applicable, EB: embryoid body differentiation protocol

**Supplementary Table 2**

| <b>Primary Antibodies</b>            | <b>Dilution</b> | <b>Vendor</b>               | <b>Order Nr./ Clone</b> |
|--------------------------------------|-----------------|-----------------------------|-------------------------|
| Sarcomeric $\alpha$ -actinin         | 1:1000-4000     | Sigma-Aldrich               | A7811                   |
| CD31 (Pecam1)                        | 1:100           | Abcam                       | ab28364                 |
| Human Anti-Integrin $\beta$ 1 (CD29) | 1:200           | Millipore                   | MAB1965                 |
| Human $\beta$ Myosin heavy chain     | 1:100           | Dev. Studies Hybridoma Bank | A4.951                  |
| $\beta$ Myosin heavy chain           | 1:500           | Dev. Studies Hybridoma Bank | MF20                    |
| Human cardiac Troponin T             | 1:200           | Abcam                       | ab45932                 |
| MLC2V                                | 1:500           | Synaptic Systems            | 310003                  |
| MLC2A                                | 1:500           | Synaptic Systems            | 56F5                    |
| Myomesin-1                           | 1:500           | Proteintech                 | 20360-1-AP              |
| N-cadherin (CDH2)                    | 1:50            | Sigma-Aldrich               | HPA058574               |
| Ki67                                 | 1:100           | Thermo Scientific           | SP6                     |
| <b>Secondary Antibodies</b>          |                 |                             |                         |
| <b>Secondary Antibodies</b>          | <b>Dilution</b> | <b>Vendor</b>               | <b>Order Nr.</b>        |
| Goat anti mouse Alexa Fluor 488      | 1:1000          | Thermo Scientific           | A-11001                 |
| Goat anti mouse Alexa Fluor 633      | 1:1000          | Thermo Scientific           | A-21052                 |
| Goat anti rabbit Alexa Fluor 633     | 1:1000          | Thermo Scientific           | A-21070                 |
| Goat anti rabbit Alexa Fluor 546     | 1:1000          | Thermo Scientific           | A-11010                 |

**Supplementary Table 2:** Overview of primary and secondary antibodies

**Supplementary Table 3: Cardiomyocyte transcriptome**

| Gene Symbol | Embryonic cardiomyocytes |      | Fetal Heart |      | Adult Heart |      |
|-------------|--------------------------|------|-------------|------|-------------|------|
|             | RPKM                     | Rank | RPKM        | Rank | RPKM        | Rank |
| MYL7        | 16361,38                 | 1    | 9101,30     | 1    | 566,72      | 30   |
| TNNT2       | 5660,97                  | 2    | 5983,81     | 2    | 5411,26     | 2    |
| NPPA        | 3082,65                  | 3    | 474,08      | 21   | 20,00       | 265  |
| MYL4        | 2393,09                  | 4    | 1248,75     | 8    | 60,04       | 142  |
| POPDC2      | 2314,59                  | 5    | 2016,64     | 5    | 1155,05     | 18   |
| PLN         | 2009,90                  | 6    | 842,31      | 13   | 886,30      | 22   |
| RGS5        | 1969,40                  | 7    | 625,01      | 15   | 1607,16     | 11   |
| ANKRD1      | 1923,96                  | 8    | 257,27      | 44   | 671,88      | 26   |
| MYL3        | 1816,20                  | 9    | 1633,33     | 6    | 1688,51     | 10   |
| FABP3       | 1585,57                  | 10   | 994,91      | 10   | 1260,77     | 15   |
| ENO3        | 1427,43                  | 11   | 504,95      | 20   | 1130,04     | 19   |
| ACTC1       | 1324,64                  | 12   | 1195,42     | 9    | 1353,81     | 14   |
| MYL2        | 1264,78                  | 13   | 754,32      | 14   | 4607,74     | 3    |
| DMD         | 1235,66                  | 14   | 2043,98     | 4    | 2030,08     | 8    |
| COL4A5      | 1100,94                  | 15   | 275,27      | 41   | 46,48       | 171  |
| MYH7        | 835,00                   | 16   | 2533,40     | 3    | 6175,99     | 1    |
| CSRP3       | 688,62                   | 17   | 309,49      | 34   | 511,22      | 31   |
| NPPB        | 683,10                   | 18   | 17,56       | 305  | 26,28       | 234  |
| HSPB7       | 655,45                   | 19   | 573,42      | 18   | 1188,17     | 16   |
| CGNL1       | 639,91                   | 20   | 524,56      | 19   | 173,74      | 62   |
| CCDC141     | 575,53                   | 21   | 910,89      | 12   | 390,40      | 38   |
| SMPX        | 554,44                   | 22   | 237,39      | 46   | 187,07      | 59   |
| NPNT        | 498,38                   | 23   | 459,41      | 24   | 7,67        | 397  |
| PDK1        | 491,20                   | 24   | 467,19      | 23   | 78,33       | 114  |
| MYOCD       | 483,98                   | 25   | 594,64      | 16   | 226,24      | 56   |
| IGFBP2      | 447,11                   | 26   | 119,56      | 79   | 70,69       | 119  |
| THBS4       | 413,05                   | 27   | 138,25      | 74   | 308,39      | 45   |
| NEBL        | 374,05                   | 28   | 275,68      | 40   | 344,30      | 42   |
| CKM         | 369,60                   | 29   | 443,76      | 25   | 1048,87     | 20   |
| TNNI3       | 364,60                   | 30   | 441,83      | 27   | 1694,21     | 9    |
| TTN         | 362,14                   | 31   | 917,23      | 11   | 1507,67     | 12   |
| MYH6        | 342,66                   | 32   | 48,72       | 161  | 246,49      | 50   |
| YPEL2       | 336,44                   | 33   | 188,34      | 60   | 162,78      | 66   |
| LAPTM4B     | 314,51                   | 34   | 138,02      | 75   | 61,08       | 139  |
| MYBPC3      | 288,67                   | 35   | 467,56      | 22   | 823,87      | 23   |
| COL15A1     | 285,00                   | 36   | 1275,76     | 7    | 896,22      | 21   |
| MLIP        | 283,44                   | 37   | 257,64      | 43   | 451,71      | 34   |
| TNNI1       | 282,25                   | 38   | 172,27      | 65   | 7,76        | 396  |
| C7          | 279,36                   | 39   | 89,24       | 101  | 47,91       | 164  |
| SPINT2      | 278,17                   | 40   | 35,57       | 199  | 11,56       | 337  |
| TECRL       | 270,33                   | 41   | 208,48      | 53   | 398,22      | 37   |
| APOA1       | 266,33                   | 42   | 4,58        | 520  | 30,89       | 212  |
| SH3BGR      | 253,18                   | 43   | 163,18      | 67   | 69,22       | 124  |



|          |        |    |        |     |         |     |
|----------|--------|----|--------|-----|---------|-----|
| APOE     | 247,27 | 44 | 14,83  | 331 | 10,64   | 347 |
| ACTN2    | 244,16 | 45 | 311,96 | 33  | 585,17  | 29  |
| CPE      | 235,06 | 46 | 63,61  | 137 | 67,32   | 125 |
| DES      | 225,84 | 47 | 368,58 | 29  | 3582,77 | 5   |
| NREP     | 220,12 | 48 | 267,10 | 42  | 6,23    | 440 |
| MYOZ2    | 219,75 | 49 | 123,07 | 77  | 288,10  | 46  |
| MDK      | 211,09 | 50 | 216,22 | 52  | 1,44    | 701 |
| LDB3     | 209,64 | 51 | 592,56 | 17  | 708,59  | 25  |
| CRIP2    | 198,67 | 52 | 216,36 | 51  | 240,89  | 53  |
| VCAM1    | 192,47 | 53 | 31,91  | 218 | 5,88    | 447 |
| APOBEC2  | 183,71 | 54 | 120,20 | 78  | 114,52  | 83  |
| IGF2     | 183,17 | 55 | 81,03  | 110 | 17,30   | 285 |
| SMYD1    | 179,38 | 56 | 190,82 | 57  | 108,57  | 86  |
| MB       | 178,19 | 57 | 338,22 | 32  | 3935,68 | 4   |
| ATP1B1   | 176,58 | 58 | 111,40 | 85  | 109,36  | 85  |
| CRYAB    | 167,14 | 59 | 299,07 | 35  | 1356,53 | 13  |
| EEF1A2   | 163,59 | 60 | 193,86 | 56  | 374,60  | 40  |
| MYOM1    | 162,53 | 61 | 351,96 | 31  | 379,57  | 39  |
| PPP1R9A  | 154,28 | 62 | 352,17 | 30  | 200,43  | 58  |
| CHD7     | 153,08 | 63 | 287,88 | 37  | 145,24  | 70  |
| MLF1     | 148,57 | 64 | 216,44 | 50  | 87,82   | 100 |
| FZD3     | 143,28 | 65 | 84,50  | 106 | 21,78   | 254 |
| GPR22    | 142,67 | 66 | 292,76 | 36  | 96,27   | 95  |
| HSPB3    | 138,05 | 67 | 198,24 | 55  | 114,77  | 82  |
| CNN1     | 134,83 | 68 | 60,26  | 138 | 107,67  | 87  |
| KRT8     | 133,29 | 69 | 23,28  | 264 | 12,26   | 330 |
| SLC25A4  | 130,57 | 70 | 88,87  | 102 | 243,91  | 52  |
| ACTA1    | 127,98 | 71 | 6,17   | 471 | 3251,70 | 6   |
| CKMT2    | 127,66 | 72 | 157,95 | 69  | 479,49  | 33  |
| TMEM71   | 126,37 | 73 | 287,57 | 38  | 91,01   | 98  |
| PROX1    | 122,15 | 74 | 243,57 | 45  | 157,24  | 67  |
| HAND2    | 121,52 | 75 | 171,09 | 66  | 64,04   | 132 |
| SLC8A1   | 119,35 | 76 | 218,76 | 49  | 93,51   | 96  |
| LMOD2    | 115,44 | 77 | 58,19  | 142 | 253,56  | 48  |
| SNTA1    | 112,27 | 78 | 93,32  | 96  | 61,19   | 138 |
| HOOK1    | 111,61 | 79 | 36,37  | 196 | 20,36   | 261 |
| ITGB1BP2 | 108,97 | 80 | 58,13  | 144 | 31,58   | 209 |
| NCAM1    | 107,50 | 81 | 157,35 | 70  | 168,72  | 64  |
| PLCL2    | 104,18 | 82 | 200,50 | 54  | 98,02   | 91  |
| BMP5     | 101,44 | 83 | 64,21  | 133 | 2,10    | 630 |
| EPHA4    | 100,69 | 84 | 17,99  | 303 | 19,06   | 272 |
| BVES     | 99,74  | 85 | 85,28  | 104 | 28,43   | 222 |
| HRC      | 99,35  | 86 | 67,72  | 126 | 320,85  | 43  |
| UNC45B   | 96,94  | 87 | 104,97 | 88  | 59,75   | 143 |
| PRKCH    | 96,64  | 88 | 72,92  | 122 | 46,95   | 168 |
| GUCY1A3  | 96,63  | 89 | 80,72  | 111 | 38,94   | 186 |
| ALDOC    | 96,58  | 90 | 118,45 | 80  | 96,41   | 93  |

|          |       |     |        |     |        |     |
|----------|-------|-----|--------|-----|--------|-----|
| RAPGEF4  | 93,68 | 91  | 82,37  | 109 | 38,73  | 187 |
| CASQ2    | 92,57 | 92  | 221,88 | 48  | 423,11 | 35  |
| PKP2     | 91,55 | 93  | 80,47  | 112 | 118,92 | 77  |
| CPVL     | 89,22 | 94  | 31,47  | 220 | 43,53  | 178 |
| GCNT2    | 87,87 | 95  | 139,39 | 73  | 67,02  | 126 |
| XPO4     | 87,30 | 96  | 63,68  | 135 | 16,30  | 289 |
| TRIM63   | 86,95 | 97  | 103,35 | 89  | 72,27  | 118 |
| SORBS2   | 86,57 | 98  | 395,76 | 28  | 261,56 | 47  |
| EDNRA    | 84,49 | 99  | 67,51  | 127 | 21,16  | 256 |
| PPP1R14C | 82,68 | 100 | 59,38  | 140 | 30,81  | 213 |
| STOX2    | 82,23 | 101 | 189,87 | 59  | 129,03 | 72  |
| SERPINA5 | 82,14 | 102 | 0,55   | 725 | 2,38   | 611 |
| PTP4A3   | 81,41 | 103 | 98,44  | 90  | 169,25 | 63  |
| AK4      | 80,96 | 104 | 84,78  | 105 | 117,92 | 79  |
| ABLIM1   | 79,99 | 105 | 109,04 | 87  | 253,18 | 49  |
| ANK2     | 79,14 | 106 | 158,12 | 68  | 123,04 | 76  |
| RBM24    | 79,06 | 107 | 183,20 | 62  | 64,63  | 131 |
| PPP1R13B | 79,05 | 108 | 174,49 | 63  | 117,75 | 80  |
| HEPH     | 78,29 | 109 | 34,17  | 207 | 6,37   | 436 |
| LRRRC17  | 77,05 | 110 | 14,80  | 332 | 1,07   | 765 |
| CORIN    | 76,98 | 111 | 111,14 | 86  | 26,47  | 233 |
| ADPRHL1  | 74,96 | 112 | 93,86  | 94  | 118,51 | 78  |
| PPP1R12B | 73,46 | 113 | 173,23 | 64  | 146,24 | 69  |
| FITM1    | 72,84 | 114 | 38,22  | 188 | 24,72  | 240 |
| PPARGC1A | 72,36 | 115 | 89,28  | 100 | 77,39  | 115 |
| ILDR2    | 72,00 | 116 | 64,77  | 132 | 28,39  | 223 |
| TCAP     | 71,70 | 117 | 34,34  | 205 | 720,26 | 24  |
| SIPA1L2  | 71,11 | 118 | 80,41  | 113 | 45,25  | 175 |
| FIGN     | 70,60 | 119 | 154,16 | 71  | 47,61  | 165 |
| SERPINI1 | 69,93 | 120 | 11,94  | 369 | 11,24  | 341 |
| FREM1    | 69,70 | 121 | 115,32 | 83  | 7,64   | 400 |
| C1orf105 | 68,10 | 122 | 3,79   | 542 | 3,16   | 559 |
| DTNA     | 66,99 | 123 | 53,10  | 150 | 102,19 | 90  |
| ASB2     | 66,88 | 124 | 44,72  | 174 | 55,38  | 149 |
| RYR2     | 66,65 | 125 | 189,96 | 58  | 487,71 | 32  |
| LRRRC10  | 66,31 | 126 | 58,14  | 143 | 20,29  | 263 |
| PPM1K    | 66,09 | 127 | 26,52  | 243 | 81,30  | 108 |
| CYP2J2   | 65,34 | 128 | 32,48  | 214 | 44,30  | 176 |
| AGL      | 65,05 | 129 | 49,83  | 158 | 28,07  | 227 |
| COL21A1  | 64,68 | 130 | 117,92 | 81  | 22,82  | 247 |
| KLHL31   | 64,50 | 131 | 48,89  | 160 | 309,59 | 44  |
| CHN2     | 64,17 | 132 | 65,20  | 130 | 55,22  | 150 |
| AQP1     | 62,87 | 133 | 33,85  | 210 | 57,38  | 147 |
| COL14A1  | 62,61 | 134 | 45,12  | 173 | 15,11  | 303 |
| NKX2-5   | 62,33 | 135 | 50,30  | 157 | 46,71  | 170 |
| RIMKLA   | 61,99 | 136 | 50,40  | 156 | 45,93  | 172 |
| FAM134B  | 61,89 | 137 | 64,02  | 134 | 130,78 | 71  |

|          |       |     |        |     |        |     |
|----------|-------|-----|--------|-----|--------|-----|
| HIF3A    | 61,72 | 138 | 285,54 | 39  | 86,64  | 101 |
| MMP15    | 61,66 | 139 | 43,48  | 177 | 22,80  | 248 |
| TBX20    | 59,65 | 140 | 183,83 | 61  | 36,83  | 194 |
| FNDC5    | 58,02 | 141 | 51,66  | 153 | 163,29 | 65  |
| TSPAN18  | 57,37 | 142 | 96,54  | 91  | 103,93 | 89  |
| RRAD     | 56,71 | 143 | 94,14  | 93  | 62,84  | 136 |
| RNF207   | 55,59 | 144 | 225,81 | 47  | 50,05  | 159 |
| MYO18B   | 55,21 | 145 | 93,10  | 97  | 85,51  | 102 |
| XIRP1    | 55,17 | 146 | 77,97  | 116 | 244,86 | 51  |
| TRDN     | 55,14 | 147 | 26,03  | 249 | 58,39  | 145 |
| NDRG2    | 54,36 | 148 | 45,37  | 171 | 78,79  | 113 |
| DLK1     | 53,79 | 149 | 93,32  | 95  | 14,92  | 304 |
| DMKN     | 52,30 | 150 | 38,01  | 190 | 5,44   | 459 |
| GREB1    | 51,94 | 151 | 82,53  | 108 | 28,35  | 224 |
| MYLK3    | 51,37 | 152 | 47,66  | 164 | 60,48  | 141 |
| IFI44L   | 50,65 | 153 | 2,77   | 578 | 82,32  | 106 |
| TMEM178A | 50,59 | 154 | 48,21  | 163 | 4,73   | 481 |
| RRAGD    | 48,74 | 155 | 27,00  | 240 | 30,18  | 218 |
| ITGA9    | 47,43 | 156 | 88,79  | 103 | 97,14  | 92  |
| MTUS1    | 47,18 | 157 | 65,37  | 129 | 79,37  | 110 |
| CASQ1    | 46,92 | 158 | 5,40   | 492 | 24,06  | 245 |
| FILIP1   | 46,57 | 159 | 58,98  | 141 | 63,19  | 134 |
| LRRRC39  | 46,42 | 160 | 56,69  | 146 | 47,99  | 163 |
| PDGFD    | 45,48 | 161 | 20,51  | 283 | 9,86   | 358 |
| B4GALNT4 | 45,34 | 162 | 8,87   | 415 | 1,77   | 657 |
| CCDC69   | 44,84 | 163 | 26,48  | 245 | 39,60  | 185 |
| PYGM     | 44,39 | 164 | 25,38  | 252 | 56,47  | 148 |
| JPH2     | 43,84 | 165 | 44,67  | 175 | 40,86  | 180 |
| CORO6    | 43,74 | 166 | 92,27  | 98  | 29,40  | 219 |
| PCDH7    | 42,92 | 167 | 73,32  | 121 | 37,36  | 193 |
| GATA4    | 42,92 | 168 | 49,26  | 159 | 37,46  | 192 |
| ISYNA1   | 42,49 | 169 | 30,67  | 224 | 8,85   | 370 |
| NAP1L3   | 41,63 | 170 | 9,96   | 399 | 2,95   | 569 |
| MTTP     | 41,20 | 171 | 0,64   | 721 | 7,10   | 413 |
| LLGL2    | 40,13 | 172 | 25,77  | 251 | 5,78   | 449 |
| RAB3IP   | 38,59 | 173 | 43,87  | 176 | 16,13  | 292 |
| PRSS42   | 38,44 | 174 | 127,77 | 76  | 52,35  | 155 |
| SLC47A1  | 37,87 | 175 | 13,96  | 345 | 15,15  | 302 |
| ST6GAL1  | 37,17 | 176 | 24,33  | 257 | 24,30  | 243 |
| AGT      | 36,99 | 177 | 18,42  | 300 | 33,79  | 199 |
| TMEM176B | 36,90 | 178 | 23,03  | 267 | 22,23  | 251 |
| VTN      | 36,81 | 179 | 0,95   | 693 | 16,25  | 290 |
| RNASE1   | 36,71 | 180 | 20,48  | 284 | 37,57  | 191 |
| SPINK5   | 36,31 | 181 | 2,71   | 582 | 4,89   | 477 |
| RBM38    | 36,17 | 182 | 32,14  | 216 | 15,96  | 294 |
| RCAN2    | 35,76 | 183 | 23,40  | 263 | 124,38 | 74  |
| S1PR1    | 35,55 | 184 | 29,14  | 230 | 20,32  | 262 |

|          |       |     |        |     |         |     |
|----------|-------|-----|--------|-----|---------|-----|
| EPB41L3  | 35,41 | 185 | 36,54  | 195 | 3,21    | 554 |
| KCNQ1    | 35,22 | 186 | 45,87  | 170 | 48,09   | 162 |
| FAM84B   | 35,16 | 187 | 34,41  | 204 | 2,77    | 589 |
| TPD52L1  | 34,79 | 188 | 9,77   | 403 | 47,07   | 167 |
| RAB9B    | 34,75 | 189 | 16,01  | 316 | 13,46   | 321 |
| CFI      | 34,63 | 190 | 2,56   | 588 | 8,16    | 386 |
| B4GALNT3 | 34,26 | 191 | 70,13  | 124 | 13,57   | 319 |
| DENND5B  | 34,24 | 192 | 27,71  | 238 | 16,23   | 291 |
| RAMP2    | 34,11 | 193 | 141,11 | 72  | 82,86   | 105 |
| MST1     | 33,98 | 194 | 11,96  | 368 | 3,35    | 547 |
| ERBB3    | 33,90 | 195 | 29,16  | 229 | 13,79   | 314 |
| RCS1     | 33,85 | 196 | 57,10  | 145 | 17,58   | 282 |
| GCA      | 33,81 | 197 | 20,57  | 282 | 6,92    | 417 |
| PGM5     | 33,76 | 198 | 55,84  | 148 | 92,21   | 97  |
| RAMP1    | 33,74 | 199 | 43,09  | 179 | 75,32   | 116 |
| ARHGAP42 | 33,32 | 200 | 18,18  | 302 | 4,41    | 495 |
| COLEC11  | 33,31 | 201 | 42,52  | 182 | 5,02    | 475 |
| LPL      | 33,31 | 202 | 442,26 | 26  | 2467,43 | 7   |
| BST2     | 33,17 | 203 | 0,67   | 719 | 12,09   | 331 |
| DUSP27   | 32,85 | 204 | 26,76  | 242 | 85,29   | 104 |
| SLAIN1   | 32,27 | 205 | 21,80  | 275 | 12,64   | 329 |
| APOB     | 31,62 | 206 | 0,74   | 713 | 3,54    | 538 |
| IGSF3    | 31,10 | 207 | 14,19  | 341 | 4,88    | 479 |
| BMP7     | 31,09 | 208 | 28,98  | 231 | 2,32    | 618 |
| PRRG3    | 30,47 | 209 | 115,96 | 82  | 14,36   | 309 |
| CTNNA3   | 30,31 | 210 | 46,35  | 169 | 31,90   | 205 |
| FAM189A2 | 30,25 | 211 | 63,62  | 136 | 11,90   | 333 |
| EDA      | 30,16 | 212 | 29,91  | 228 | 15,41   | 299 |
| CMYA5    | 30,16 | 213 | 47,52  | 165 | 653,71  | 27  |
| PLEKHA7  | 29,75 | 214 | 96,34  | 92  | 20,18   | 264 |
| COL4A6   | 29,60 | 215 | 5,66   | 487 | 3,94    | 524 |
| CDKN1C   | 29,57 | 216 | 14,46  | 337 | 11,27   | 340 |
| TRIM24   | 29,48 | 217 | 20,77  | 281 | 3,96    | 522 |
| SMTNL2   | 29,41 | 218 | 2,60   | 586 | 8,27    | 384 |
| TRIM54   | 29,36 | 219 | 28,13  | 234 | 73,33   | 117 |
| ITGA7    | 29,25 | 220 | 38,04  | 189 | 123,29  | 75  |
| ALPK3    | 29,00 | 221 | 52,28  | 152 | 50,64   | 158 |
| PARM1    | 28,98 | 222 | 41,23  | 184 | 31,67   | 207 |
| FAM78A   | 28,80 | 223 | 21,17  | 278 | 8,89    | 369 |
| PTPRD    | 28,73 | 224 | 28,83  | 232 | 3,58    | 533 |
| TMOD1    | 28,67 | 225 | 33,28  | 213 | 34,33   | 197 |
| CLGN     | 28,46 | 226 | 25,90  | 250 | 32,71   | 202 |
| GAB1     | 28,07 | 227 | 69,20  | 125 | 19,52   | 266 |
| NAALAD2  | 27,76 | 228 | 47,50  | 166 | 5,57    | 454 |
| SLC4A3   | 27,63 | 229 | 83,16  | 107 | 96,31   | 94  |
| ADCY5    | 27,49 | 230 | 42,78  | 180 | 40,37   | 182 |
| BCL2L11  | 27,42 | 231 | 46,41  | 168 | 19,32   | 269 |

|           |       |     |       |     |        |     |
|-----------|-------|-----|-------|-----|--------|-----|
| SYNPO2L   | 27,35 | 232 | 24,54 | 255 | 70,34  | 122 |
| MYH7B     | 27,19 | 233 | 80,09 | 115 | 37,68  | 190 |
| ABCB4     | 27,12 | 234 | 65,19 | 131 | 31,62  | 208 |
| PROM1     | 26,88 | 235 | 23,06 | 266 | 22,75  | 249 |
| TSTD1     | 26,42 | 236 | 26,24 | 247 | 3,48   | 541 |
| CADPS     | 26,14 | 237 | 12,89 | 354 | 8,76   | 373 |
| VSNL1     | 26,13 | 238 | 10,27 | 391 | 14,14  | 311 |
| BCAM      | 25,85 | 239 | 51,64 | 154 | 25,35  | 238 |
| GARNL3    | 25,34 | 240 | 76,22 | 119 | 64,97  | 129 |
| TMEM133   | 25,34 | 241 | 12,63 | 356 | 2,88   | 577 |
| VASH1     | 25,28 | 242 | 12,25 | 363 | 4,07   | 515 |
| KCNH2     | 25,04 | 243 | 34,22 | 206 | 25,83  | 237 |
| RBM20     | 24,99 | 244 | 72,17 | 123 | 50,91  | 156 |
| ADHFE1    | 24,98 | 245 | 80,23 | 114 | 61,48  | 137 |
| DSG2      | 24,30 | 246 | 15,97 | 317 | 14,11  | 312 |
| RAB3C     | 24,16 | 247 | 2,08  | 615 | 1,32   | 720 |
| FRAS1     | 23,79 | 248 | 48,36 | 162 | 4,39   | 496 |
| CSRNP3    | 23,58 | 249 | 25,05 | 253 | 12,04  | 332 |
| ADAMTS9   | 23,47 | 250 | 30,22 | 227 | 22,29  | 250 |
| DOK7      | 23,27 | 251 | 33,37 | 212 | 34,53  | 196 |
| ACOT11    | 23,21 | 252 | 77,92 | 117 | 40,30  | 183 |
| RASL11B   | 22,36 | 253 | 10,47 | 387 | 2,11   | 629 |
| UNC13D    | 22,29 | 254 | 10,91 | 381 | 9,26   | 365 |
| DUSP26    | 21,86 | 255 | 9,12  | 410 | 18,25  | 278 |
| STAT4     | 21,77 | 256 | 27,98 | 235 | 1,48   | 696 |
| MED12L    | 21,76 | 257 | 23,80 | 260 | 7,83   | 391 |
| FAM160A1  | 21,62 | 258 | 19,05 | 297 | 63,57  | 133 |
| GATM      | 21,61 | 259 | 8,85  | 418 | 8,61   | 375 |
| CACNB2    | 21,37 | 260 | 56,67 | 147 | 26,52  | 231 |
| CIB2      | 21,35 | 261 | 10,88 | 382 | 2,93   | 571 |
| NIPSNAP3B | 21,18 | 262 | 17,21 | 310 | 24,12  | 244 |
| TTC39A    | 21,07 | 263 | 2,61  | 585 | 9,04   | 368 |
| ICA1      | 21,03 | 264 | 23,45 | 262 | 26,18  | 236 |
| SRL       | 20,85 | 265 | 77,04 | 118 | 128,90 | 73  |
| SGCA      | 20,65 | 266 | 46,83 | 167 | 70,15  | 123 |
| ATRN1     | 20,45 | 267 | 4,54  | 522 | 9,88   | 357 |
| FAM81A    | 20,39 | 268 | 42,34 | 183 | 4,04   | 516 |
| COX6A2    | 20,19 | 269 | 60,10 | 139 | 347,99 | 41  |
| HOPX      | 20,14 | 270 | 7,97  | 432 | 5,36   | 464 |
| PDE4D     | 19,90 | 271 | 16,83 | 314 | 18,41  | 276 |
| EGLN3     | 19,77 | 272 | 19,90 | 292 | 52,90  | 151 |
| PRKAA2    | 19,61 | 273 | 30,31 | 226 | 60,97  | 140 |
| MAN1C1    | 19,50 | 274 | 8,17  | 426 | 6,49   | 428 |
| SCN5A     | 19,49 | 275 | 36,04 | 197 | 57,61  | 146 |
| ZNRF2     | 19,47 | 276 | 10,39 | 390 | 5,65   | 452 |
| SLC1A3    | 19,41 | 277 | 33,84 | 211 | 26,26  | 235 |
| CLIC5     | 19,19 | 278 | 18,90 | 299 | 107,56 | 88  |

|          |       |     |        |     |        |     |
|----------|-------|-----|--------|-----|--------|-----|
| FGF12    | 19,02 | 279 | 112,31 | 84  | 50,73  | 157 |
| CADM4    | 18,85 | 280 | 7,01   | 449 | 3,01   | 567 |
| LAD1     | 18,81 | 281 | 2,19   | 608 | 4,17   | 510 |
| RASSF4   | 18,74 | 282 | 15,60  | 321 | 15,23  | 301 |
| CMTM5    | 18,60 | 283 | 5,25   | 501 | 6,47   | 429 |
| TMEM56   | 18,60 | 284 | 12,38  | 360 | 14,88  | 306 |
| OBSCN    | 18,24 | 285 | 43,34  | 178 | 79,35  | 111 |
| EPHA7    | 18,16 | 286 | 19,97  | 291 | 3,37   | 546 |
| PPP1R1C  | 18,07 | 287 | 12,39  | 359 | 52,53  | 154 |
| OSBP2    | 18,00 | 288 | 12,03  | 366 | 5,84   | 448 |
| PLCXD3   | 17,92 | 289 | 53,01  | 151 | 26,51  | 232 |
| CAND2    | 17,87 | 290 | 12,07  | 365 | 20,66  | 260 |
| GJA3     | 17,71 | 291 | 24,67  | 254 | 9,92   | 356 |
| INPP5J   | 17,51 | 292 | 9,56   | 405 | 32,03  | 204 |
| AKAP6    | 17,44 | 293 | 34,14  | 208 | 45,79  | 173 |
| MURC     | 17,42 | 294 | 18,42  | 301 | 19,35  | 268 |
| PRICKLE1 | 17,32 | 295 | 14,93  | 330 | 3,99   | 521 |
| SPHKAP   | 17,27 | 296 | 51,55  | 155 | 38,07  | 189 |
| RASSF5   | 17,13 | 297 | 14,66  | 335 | 7,37   | 406 |
| PPP1R1A  | 16,83 | 298 | 21,88  | 274 | 10,57  | 348 |
| FAM184A  | 16,82 | 299 | 9,70   | 404 | 1,79   | 653 |
| SLC38A3  | 16,74 | 300 | 7,19   | 446 | 6,45   | 430 |
| HTRA3    | 16,72 | 301 | 15,32  | 323 | 24,38  | 242 |
| PLCB2    | 16,62 | 302 | 32,20  | 215 | 15,89  | 296 |
| FXVD6    | 16,54 | 303 | 35,44  | 200 | 5,54   | 456 |
| PPFIA4   | 16,42 | 304 | 31,61  | 219 | 8,51   | 377 |
| ITIH3    | 16,35 | 305 | 1,44   | 657 | 2,33   | 617 |
| ANO5     | 16,31 | 306 | 20,28  | 287 | 30,25  | 217 |
| ACSM3    | 16,11 | 307 | 15,49  | 322 | 18,09  | 279 |
| EFNA1    | 15,92 | 308 | 11,25  | 375 | 10,29  | 353 |
| F5       | 15,87 | 309 | 10,15  | 397 | 14,42  | 308 |
| SLC40A1  | 15,84 | 310 | 23,72  | 261 | 13,65  | 315 |
| SHC2     | 15,79 | 311 | 11,10  | 378 | 6,43   | 434 |
| PPM1L    | 15,76 | 312 | 35,63  | 198 | 70,66  | 120 |
| MTSS1    | 15,73 | 313 | 33,96  | 209 | 10,90  | 345 |
| ZNF711   | 15,71 | 314 | 21,99  | 273 | 1,44   | 700 |
| GPRIN3   | 15,66 | 315 | 38,23  | 187 | 7,31   | 408 |
| SLC2A4   | 15,65 | 316 | 15,11  | 328 | 47,17  | 166 |
| VSTM2L   | 15,57 | 317 | 7,41   | 443 | 1,49   | 693 |
| SSTR2    | 15,46 | 318 | 5,74   | 484 | 5,39   | 462 |
| KLHL3    | 15,44 | 319 | 17,69  | 304 | 7,66   | 398 |
| CXADR    | 15,38 | 320 | 12,26  | 362 | 10,06  | 354 |
| GPX3     | 15,16 | 321 | 7,90   | 435 | 175,17 | 61  |
| RASL10B  | 15,13 | 322 | 4,26   | 528 | 4,16   | 511 |
| CAMK2B   | 15,09 | 323 | 14,74  | 333 | 44,30  | 177 |
| PPP1R3A  | 15,05 | 324 | 5,25   | 500 | 58,72  | 144 |
| SLC7A2   | 14,76 | 325 | 4,66   | 516 | 13,65  | 316 |

|           |       |     |       |     |        |     |
|-----------|-------|-----|-------|-----|--------|-----|
| HEY2      | 14,66 | 326 | 31,94 | 217 | 11,67  | 335 |
| HHATL     | 14,61 | 327 | 26,49 | 244 | 237,29 | 54  |
| DYSF      | 14,23 | 328 | 10,03 | 398 | 24,40  | 241 |
| TMEM176A  | 14,22 | 329 | 9,81  | 402 | 10,45  | 350 |
| METTL7A   | 13,93 | 330 | 5,91  | 479 | 5,12   | 472 |
| ESRRG     | 13,81 | 331 | 28,18 | 233 | 14,35  | 310 |
| ERBB4     | 13,78 | 332 | 37,56 | 192 | 3,49   | 539 |
| WNK2      | 13,68 | 333 | 90,80 | 99  | 79,09  | 112 |
| PLBD1     | 13,66 | 334 | 14,28 | 339 | 7,78   | 393 |
| COLQ      | 13,65 | 335 | 12,29 | 361 | 2,70   | 595 |
| FRMD4B    | 13,65 | 336 | 37,82 | 191 | 4,12   | 512 |
| FBXO40    | 13,63 | 337 | 31,13 | 222 | 79,87  | 109 |
| TNNT1     | 13,55 | 338 | 14,70 | 334 | 40,78  | 181 |
| SELP      | 13,51 | 339 | 1,38  | 663 | 2,28   | 619 |
| COL9A3    | 13,40 | 340 | 17,12 | 313 | 4,41   | 493 |
| MTUS2     | 13,38 | 341 | 54,74 | 149 | 18,49  | 275 |
| PTGES3L   | 13,28 | 342 | 11,14 | 377 | 5,08   | 473 |
| HEY1      | 13,05 | 343 | 4,19  | 532 | 4,88   | 480 |
| GRIA4     | 12,89 | 344 | 2,82  | 574 | 1,37   | 712 |
| FTCD      | 12,87 | 345 | 5,03  | 506 | 2,07   | 632 |
| TXLNB     | 12,79 | 346 | 22,18 | 271 | 31,75  | 206 |
| TESC      | 12,72 | 347 | 13,41 | 351 | 33,68  | 200 |
| TMEM38A   | 12,69 | 348 | 6,35  | 464 | 11,44  | 338 |
| DERL3     | 12,56 | 349 | 14,08 | 343 | 2,59   | 597 |
| EPHX2     | 12,35 | 350 | 8,85  | 417 | 8,68   | 374 |
| FSD2      | 12,18 | 351 | 21,09 | 279 | 13,29  | 323 |
| NGFR      | 11,85 | 352 | 2,90  | 568 | 7,45   | 405 |
| GUCY1B3   | 11,83 | 353 | 19,87 | 293 | 14,78  | 307 |
| SORCS1    | 11,82 | 354 | 2,96  | 565 | 1,33   | 717 |
| RXRG      | 11,81 | 355 | 1,53  | 649 | 3,42   | 544 |
| SPSB4     | 11,73 | 356 | 11,33 | 374 | 1,85   | 646 |
| SLC16A12  | 11,54 | 357 | 8,68  | 419 | 2,37   | 614 |
| KCNJ5     | 11,52 | 358 | 8,11  | 427 | 6,38   | 435 |
| SPON1     | 11,45 | 359 | 11,08 | 379 | 4,47   | 491 |
| PPARGC1B  | 11,34 | 360 | 26,12 | 248 | 40,20  | 184 |
| CHRNA3    | 11,30 | 361 | 2,35  | 600 | 2,82   | 584 |
| RASGRP3   | 11,24 | 362 | 26,76 | 241 | 19,41  | 267 |
| KIAA1324L | 11,23 | 363 | 2,36  | 599 | 1,61   | 676 |
| JPH1      | 11,12 | 364 | 10,85 | 383 | 7,00   | 415 |
| ACVR2B    | 11,11 | 365 | 8,39  | 423 | 3,13   | 560 |
| EPB41L4A  | 11,09 | 366 | 37,55 | 193 | 9,93   | 355 |
| AMT       | 11,07 | 367 | 12,03 | 367 | 6,77   | 421 |
| HRASLS    | 11,02 | 368 | 5,33  | 493 | 2,26   | 621 |
| IRX4      | 10,90 | 369 | 16,74 | 315 | 4,11   | 513 |
| KLHL30    | 10,88 | 370 | 7,83  | 437 | 5,95   | 444 |
| ADSSL1    | 10,84 | 371 | 23,92 | 259 | 38,20  | 188 |
| RBPMS2    | 10,69 | 372 | 20,16 | 288 | 31,53  | 211 |

|          |       |     |       |     |        |     |
|----------|-------|-----|-------|-----|--------|-----|
| GAS7     | 10,29 | 373 | 13,90 | 347 | 13,52  | 320 |
| ENPEP    | 10,24 | 374 | 66,44 | 128 | 32,56  | 203 |
| REEP1    | 10,15 | 375 | 14,19 | 342 | 7,77   | 394 |
| RCOR2    | 10,14 | 376 | 6,62  | 459 | 1,39   | 705 |
| CA3      | 10,01 | 377 | 2,09  | 614 | 9,36   | 364 |
| APLNR    | 9,96  | 378 | 36,72 | 194 | 17,41  | 283 |
| FHIT     | 9,93  | 379 | 11,61 | 372 | 9,18   | 366 |
| INHA     | 9,92  | 380 | 2,00  | 619 | 4,04   | 517 |
| WBSCR17  | 9,89  | 381 | 6,82  | 453 | 22,02  | 252 |
| ATP1B2   | 9,80  | 382 | 35,31 | 201 | 7,51   | 403 |
| TET1     | 9,78  | 383 | 17,16 | 312 | 1,54   | 686 |
| IGSF1    | 9,76  | 384 | 0,08  | 769 | 1,77   | 656 |
| PDE9A    | 9,56  | 385 | 8,96  | 413 | 4,27   | 503 |
| SLCO2B1  | 9,50  | 386 | 15,24 | 325 | 81,61  | 107 |
| SH3BGRL2 | 9,34  | 387 | 3,73  | 545 | 2,78   | 587 |
| RNF144A  | 9,13  | 388 | 11,64 | 371 | 7,31   | 407 |
| TPD52    | 9,11  | 389 | 5,04  | 504 | 2,90   | 574 |
| FBXL22   | 9,09  | 390 | 22,40 | 270 | 5,89   | 446 |
| ASB11    | 9,07  | 391 | 17,21 | 309 | 27,29  | 228 |
| SEPP1    | 9,04  | 392 | 5,71  | 485 | 10,30  | 352 |
| CREB5    | 8,97  | 393 | 40,32 | 185 | 20,97  | 258 |
| HCN4     | 8,93  | 394 | 8,57  | 422 | 4,44   | 492 |
| CP       | 8,93  | 395 | 0,37  | 733 | 1,28   | 727 |
| MYOM2    | 8,90  | 396 | 22,50 | 269 | 422,21 | 36  |
| NEURL2   | 8,88  | 397 | 7,93  | 433 | 3,40   | 545 |
| FGF18    | 8,86  | 398 | 24,34 | 256 | 13,23  | 325 |
| TSPAN12  | 8,86  | 399 | 20,02 | 290 | 18,01  | 280 |
| ADCY1    | 8,78  | 400 | 22,08 | 272 | 19,31  | 270 |
| C6       | 8,66  | 401 | 5,26  | 499 | 115,06 | 81  |
| ESAM     | 8,58  | 402 | 45,26 | 172 | 65,67  | 128 |
| RNF165   | 8,56  | 403 | 20,16 | 289 | 7,13   | 412 |
| USP2     | 8,53  | 404 | 13,93 | 346 | 27,07  | 229 |
| KIAA0895 | 8,50  | 405 | 6,89  | 450 | 1,32   | 719 |
| TNFSF10  | 8,37  | 406 | 2,11  | 612 | 15,94  | 295 |
| C11orf21 | 8,36  | 407 | 0,35  | 735 | 6,75   | 423 |
| CNTN4    | 8,32  | 408 | 31,30 | 221 | 3,62   | 532 |
| TMC6     | 8,29  | 409 | 15,20 | 326 | 6,36   | 437 |
| MARK1    | 8,26  | 410 | 12,47 | 358 | 5,49   | 457 |
| PCDHB5   | 8,18  | 411 | 0,66  | 720 | 1,25   | 734 |
| PAIP2B   | 8,09  | 412 | 30,56 | 225 | 29,28  | 220 |
| GADD45G  | 8,07  | 413 | 2,87  | 570 | 21,81  | 253 |
| ADD2     | 8,05  | 414 | 21,24 | 277 | 1,49   | 692 |
| CCL21    | 8,03  | 415 | 7,26  | 444 | 2,27   | 620 |
| PTH1R    | 7,93  | 416 | 5,01  | 507 | 3,32   | 549 |
| CCDC3    | 7,75  | 417 | 8,93  | 414 | 3,00   | 568 |
| PRKCZ    | 7,75  | 418 | 7,02  | 448 | 2,82   | 583 |
| NRAP     | 7,74  | 419 | 19,84 | 294 | 607,96 | 28  |



|          |      |     |       |     |        |     |
|----------|------|-----|-------|-----|--------|-----|
| ATP1A3   | 7,74 | 420 | 34,92 | 203 | 85,41  | 103 |
| TGFB3    | 7,73 | 421 | 9,20  | 408 | 10,99  | 344 |
| ARHGAP26 | 7,70 | 422 | 17,52 | 308 | 15,54  | 298 |
| SLC29A2  | 7,42 | 423 | 10,84 | 384 | 4,88   | 478 |
| CAMK2A   | 7,27 | 424 | 7,93  | 434 | 3,68   | 530 |
| RBFOX1   | 7,21 | 425 | 26,38 | 246 | 30,62  | 214 |
| SPATA25  | 7,11 | 426 | 10,67 | 386 | 3,87   | 525 |
| PTGER3   | 7,05 | 427 | 6,30  | 467 | 2,02   | 636 |
| MAPK4    | 6,97 | 428 | 0,87  | 701 | 13,40  | 322 |
| GCOM1    | 6,95 | 429 | 21,44 | 276 | 16,79  | 288 |
| C10orf35 | 6,94 | 430 | 1,40  | 659 | 1,13   | 755 |
| ITM2A    | 6,94 | 431 | 17,54 | 306 | 18,70  | 273 |
| SHE      | 6,84 | 432 | 42,78 | 181 | 65,72  | 127 |
| AMY2B    | 6,82 | 433 | 12,62 | 357 | 6,98   | 416 |
| ADORA1   | 6,81 | 434 | 2,91  | 567 | 2,44   | 604 |
| NT5M     | 6,77 | 435 | 9,07  | 412 | 2,81   | 585 |
| GKAP1    | 6,73 | 436 | 12,81 | 355 | 7,46   | 404 |
| LRRTM3   | 6,73 | 437 | 19,00 | 298 | 5,72   | 451 |
| ATP1A2   | 6,73 | 438 | 6,43  | 462 | 149,03 | 68  |
| HAND1    | 6,67 | 439 | 8,07  | 430 | 6,51   | 426 |
| ACACB    | 6,64 | 440 | 30,87 | 223 | 32,85  | 201 |
| FAM13C   | 6,60 | 441 | 6,87  | 452 | 2,91   | 573 |
| CPNE5    | 6,57 | 442 | 5,27  | 496 | 26,85  | 230 |
| SLC44A5  | 6,52 | 443 | 1,60  | 642 | 1,21   | 741 |
| SLC5A1   | 6,44 | 444 | 27,72 | 237 | 30,46  | 216 |
| IGSF9B   | 6,34 | 445 | 75,23 | 120 | 52,64  | 153 |
| ASXL3    | 6,30 | 446 | 17,53 | 307 | 3,29   | 550 |
| L3MBTL4  | 6,28 | 447 | 8,26  | 424 | 1,76   | 658 |
| CELSR1   | 6,28 | 448 | 15,27 | 324 | 4,09   | 514 |
| RELN     | 6,26 | 449 | 2,82  | 573 | 1,72   | 662 |
| RASGRP2  | 6,15 | 450 | 4,52  | 523 | 5,28   | 465 |
| EGF      | 6,15 | 451 | 4,03  | 537 | 6,45   | 431 |
| ELOVL2   | 6,04 | 452 | 2,00  | 620 | 2,38   | 610 |
| TYRP1    | 6,00 | 453 | 0,43  | 731 | 70,35  | 121 |
| ADAM11   | 5,98 | 454 | 24,14 | 258 | 2,17   | 626 |
| SPTB     | 5,96 | 455 | 14,47 | 336 | 28,35  | 225 |
| COL23A1  | 5,70 | 456 | 4,10  | 534 | 8,11   | 388 |
| MPPED2   | 5,66 | 457 | 15,81 | 319 | 2,47   | 602 |
| TNNI3K   | 5,62 | 458 | 15,90 | 318 | 7,65   | 399 |
| AIF1L    | 5,62 | 459 | 14,24 | 340 | 6,51   | 427 |
| B3GNT7   | 5,62 | 460 | 3,32  | 556 | 1,35   | 715 |
| RALYL    | 5,59 | 461 | 0,78  | 709 | 4,03   | 518 |
| DSC2     | 5,54 | 462 | 5,78  | 481 | 5,43   | 460 |
| MPP7     | 5,54 | 463 | 6,00  | 474 | 4,17   | 509 |
| NEB      | 5,45 | 464 | 0,88  | 700 | 7,61   | 401 |
| AUTS2    | 5,37 | 465 | 13,41 | 352 | 2,90   | 575 |
| ACE2     | 5,35 | 466 | 12,21 | 364 | 8,44   | 381 |

|            |      |     |       |     |         |     |
|------------|------|-----|-------|-----|---------|-----|
| RAB6B      | 5,33 | 467 | 3,44  | 555 | 9,66    | 361 |
| BCO2       | 5,32 | 468 | 15,61 | 320 | 30,51   | 215 |
| ABCG1      | 5,26 | 469 | 7,12  | 447 | 7,09    | 414 |
| EFHC2      | 5,23 | 470 | 6,88  | 451 | 8,47    | 378 |
| WNT11      | 5,18 | 471 | 4,09  | 535 | 1,89    | 644 |
| ZNF853     | 5,18 | 472 | 5,28  | 495 | 4,25    | 505 |
| SORBS1     | 5,13 | 473 | 38,62 | 186 | 209,93  | 57  |
| SFMBT2     | 5,01 | 474 | 3,72  | 546 | 4,26    | 504 |
| XIRP2      | 4,94 | 475 | 5,96  | 476 | 1165,62 | 17  |
| CXXC4      | 4,92 | 476 | 4,23  | 531 | 1,81    | 651 |
| PDE3B      | 4,91 | 477 | 9,08  | 411 | 4,30    | 501 |
| PIP5K1B    | 4,87 | 478 | 20,38 | 285 | 23,77   | 246 |
| TMEM179    | 4,86 | 479 | 6,05  | 472 | 2,71    | 592 |
| NAP1L2     | 4,85 | 480 | 0,13  | 762 | 3,03    | 566 |
| LGI2       | 4,83 | 481 | 2,66  | 583 | 1,46    | 699 |
| TRIL       | 4,83 | 482 | 7,62  | 439 | 1,14    | 752 |
| ARHGAP4    | 4,74 | 483 | 9,51  | 406 | 3,81    | 527 |
| NTRK1      | 4,68 | 484 | 0,83  | 706 | 4,23    | 507 |
| FAM222A    | 4,67 | 485 | 1,22  | 673 | 2,43    | 606 |
| MGAT3      | 4,60 | 486 | 0,85  | 705 | 1,75    | 660 |
| C14orf180  | 4,56 | 487 | 13,20 | 353 | 20,73   | 259 |
| ART3       | 4,55 | 488 | 10,45 | 389 | 111,21  | 84  |
| ST6GALNAC3 | 4,53 | 489 | 2,37  | 598 | 1,06    | 768 |
| PTPRE      | 4,53 | 490 | 2,25  | 604 | 9,14    | 367 |
| SYTL1      | 4,49 | 491 | 2,51  | 591 | 1,84    | 647 |
| DYNC111    | 4,49 | 492 | 0,17  | 754 | 11,04   | 343 |
| NUP210     | 4,46 | 493 | 8,18  | 425 | 1,04    | 770 |
| KCNA4      | 4,44 | 494 | 9,16  | 409 | 3,56    | 536 |
| SOBP       | 4,41 | 495 | 10,23 | 396 | 6,77    | 420 |
| LDHD       | 4,41 | 496 | 10,26 | 392 | 28,74   | 221 |
| CASZ1      | 4,34 | 497 | 11,51 | 373 | 6,44    | 432 |
| DUSP13     | 4,21 | 498 | 0,33  | 741 | 8,77    | 371 |
| BCL11A     | 4,19 | 499 | 11,77 | 370 | 3,54    | 537 |
| LGI4       | 4,15 | 500 | 2,20  | 607 | 2,86    | 578 |
| CDK18      | 4,15 | 501 | 23,06 | 265 | 64,75   | 130 |
| TMEM88     | 4,13 | 502 | 10,69 | 385 | 6,86    | 418 |
| PRKCB      | 4,05 | 503 | 2,90  | 569 | 1,36    | 713 |
| COBL       | 3,99 | 504 | 22,74 | 268 | 21,50   | 255 |
| MOG        | 3,93 | 505 | 1,83  | 627 | 2,21    | 625 |
| CPEB3      | 3,87 | 506 | 6,82  | 454 | 5,26    | 466 |
| TSHZ2      | 3,71 | 507 | 1,64  | 637 | 1,21    | 739 |
| RIC3       | 3,69 | 508 | 0,88  | 699 | 5,37    | 463 |
| NRK        | 3,69 | 509 | 15,14 | 327 | 1,71    | 663 |
| ZMAT1      | 3,69 | 510 | 10,26 | 394 | 9,71    | 360 |
| VAV3       | 3,65 | 511 | 2,40  | 597 | 1,29    | 725 |
| SLC30A3    | 3,65 | 512 | 5,77  | 482 | 2,15    | 627 |
| RASGEF1B   | 3,61 | 513 | 5,51  | 490 | 2,66    | 596 |

|          |      |     |       |     |       |     |
|----------|------|-----|-------|-----|-------|-----|
| NMNAT3   | 3,60 | 514 | 4,14  | 533 | 3,17  | 558 |
| PTPN6    | 3,59 | 515 | 4,63  | 518 | 4,99  | 476 |
| KIF26A   | 3,58 | 516 | 3,94  | 539 | 3,35  | 548 |
| PARK2    | 3,58 | 517 | 3,01  | 563 | 8,16  | 387 |
| AFAP1L2  | 3,56 | 518 | 4,70  | 515 | 2,37  | 613 |
| MERTK    | 3,53 | 519 | 5,67  | 486 | 4,18  | 508 |
| LMOD3    | 3,42 | 520 | 13,61 | 350 | 46,82 | 169 |
| MPZL2    | 3,42 | 521 | 0,67  | 717 | 3,42  | 543 |
| CACNA1H  | 3,40 | 522 | 1,15  | 680 | 1,94  | 640 |
| SKIDA1   | 3,40 | 523 | 3,53  | 551 | 1,18  | 744 |
| ATG9B    | 3,35 | 524 | 6,22  | 470 | 2,01  | 637 |
| TMEM74B  | 3,34 | 525 | 1,84  | 626 | 2,40  | 608 |
| ELMO1    | 3,29 | 526 | 13,68 | 348 | 9,44  | 363 |
| VANGL2   | 3,26 | 527 | 3,86  | 541 | 1,39  | 708 |
| MCF2L    | 3,25 | 528 | 7,59  | 440 | 10,89 | 346 |
| PLEKHH1  | 3,25 | 529 | 3,49  | 553 | 1,71  | 664 |
| C10orf71 | 3,24 | 530 | 13,66 | 349 | 35,80 | 195 |
| S100A8   | 3,24 | 531 | 1,45  | 654 | 5,77  | 450 |
| PNMT     | 3,22 | 532 | 3,57  | 549 | 2,52  | 598 |
| KBTBD11  | 3,16 | 533 | 4,78  | 514 | 3,17  | 557 |
| RALGPS1  | 3,16 | 534 | 8,67  | 420 | 4,69  | 484 |
| SAMSN1   | 3,14 | 535 | 1,52  | 651 | 1,31  | 721 |
| MGAT4A   | 3,12 | 536 | 2,98  | 564 | 5,21  | 469 |
| PCDHB15  | 3,08 | 537 | 1,57  | 645 | 3,23  | 552 |
| MYADML2  | 3,08 | 538 | 1,44  | 656 | 1,54  | 685 |
| PRDM16   | 3,05 | 539 | 15,03 | 329 | 6,06  | 443 |
| NR0B2    | 3,05 | 540 | 0,14  | 760 | 2,07  | 631 |
| EPHA3    | 3,02 | 541 | 5,93  | 478 | 4,37  | 498 |
| SCARF1   | 2,99 | 542 | 7,51  | 441 | 5,04  | 474 |
| CTNND2   | 2,99 | 543 | 5,27  | 498 | 6,31  | 438 |
| RAB17    | 2,92 | 544 | 1,55  | 648 | 1,37  | 711 |
| SYT17    | 2,91 | 545 | 10,46 | 388 | 2,72  | 590 |
| XK       | 2,91 | 546 | 2,58  | 587 | 3,85  | 526 |
| ABRA     | 2,89 | 547 | 1,69  | 635 | 48,97 | 161 |
| SPN      | 2,81 | 548 | 10,26 | 393 | 1,32  | 718 |
| SLC16A10 | 2,80 | 549 | 6,70  | 457 | 4,27  | 502 |
| SLC35F1  | 2,74 | 550 | 2,01  | 618 | 3,05  | 564 |
| PRSS45   | 2,74 | 551 | 4,97  | 508 | 3,44  | 542 |
| ADAMTS8  | 2,73 | 552 | 8,86  | 416 | 1,70  | 669 |
| CES1     | 2,73 | 553 | 4,05  | 536 | 7,29  | 410 |
| KCNJ4    | 2,73 | 554 | 5,30  | 494 | 8,42  | 382 |
| HMGCS2   | 2,72 | 555 | 0,07  | 771 | 3,57  | 535 |
| CA2      | 2,70 | 556 | 1,98  | 622 | 4,63  | 486 |
| PCDHB14  | 2,67 | 557 | 1,40  | 660 | 1,83  | 648 |
| KIAA1958 | 2,66 | 558 | 3,07  | 562 | 1,47  | 697 |
| HRH2     | 2,66 | 559 | 19,66 | 295 | 12,78 | 328 |
| SPINK7   | 2,63 | 560 | 27,18 | 239 | 5,46  | 458 |

|          |      |     |       |     |       |     |
|----------|------|-----|-------|-----|-------|-----|
| PACRG    | 2,61 | 561 | 6,32  | 466 | 4,51  | 489 |
| FAM110C  | 2,59 | 562 | 0,67  | 718 | 1,15  | 750 |
| ESRRB    | 2,58 | 563 | 4,62  | 519 | 6,60  | 424 |
| CA14     | 2,57 | 564 | 9,84  | 401 | 3,22  | 553 |
| APOBEC4  | 2,54 | 565 | 6,00  | 473 | 2,37  | 615 |
| ARHGAP44 | 2,54 | 566 | 5,96  | 475 | 3,20  | 556 |
| HFM1     | 2,53 | 567 | 10,24 | 395 | 4,02  | 519 |
| MYH11    | 2,42 | 568 | 4,24  | 530 | 17,33 | 284 |
| RAP1GAP  | 2,41 | 569 | 1,73  | 632 | 1,24  | 735 |
| PCDHB12  | 2,41 | 570 | 2,03  | 616 | 1,55  | 684 |
| EBF4     | 2,40 | 571 | 3,12  | 560 | 1,39  | 706 |
| WT1      | 2,40 | 572 | 3,31  | 557 | 1,88  | 645 |
| JAG2     | 2,39 | 573 | 1,72  | 633 | 4,02  | 520 |
| HPR      | 2,38 | 574 | 3,45  | 554 | 15,29 | 300 |
| RGS16    | 2,38 | 575 | 1,12  | 681 | 2,47  | 603 |
| P2RY1    | 2,35 | 576 | 1,77  | 630 | 1,48  | 694 |
| ST8SIA6  | 2,35 | 577 | 11,16 | 376 | 10,51 | 349 |
| SEMA6B   | 2,31 | 578 | 1,60  | 641 | 4,23  | 506 |
| NTN1     | 2,28 | 579 | 2,25  | 602 | 6,14  | 441 |
| MAOB     | 2,23 | 580 | 20,33 | 286 | 45,57 | 174 |
| ELF3     | 2,22 | 581 | 0,16  | 757 | 1,07  | 767 |
| SULT1C4  | 2,22 | 582 | 8,61  | 421 | 1,59  | 679 |
| CPNE4    | 2,19 | 583 | 1,61  | 640 | 8,45  | 379 |
| SEMA5B   | 2,19 | 584 | 27,84 | 236 | 8,45  | 380 |
| NINJ2    | 2,17 | 585 | 9,94  | 400 | 2,80  | 586 |
| ABLIM2   | 2,15 | 586 | 1,07  | 684 | 6,56  | 425 |
| VWA7     | 2,13 | 587 | 1,98  | 623 | 4,53  | 488 |
| HP       | 2,13 | 588 | 0,62  | 722 | 1,42  | 703 |
| GABRB1   | 2,12 | 589 | 6,35  | 465 | 11,67 | 334 |
| KCNJ11   | 2,09 | 590 | 1,60  | 643 | 2,72  | 591 |
| DNAJC5G  | 2,08 | 591 | 6,64  | 458 | 2,26  | 622 |
| NFATC2   | 2,06 | 592 | 2,47  | 593 | 1,52  | 691 |
| GNG7     | 2,04 | 593 | 6,75  | 455 | 8,20  | 385 |
| SEC14L5  | 2,02 | 594 | 5,27  | 497 | 3,09  | 563 |
| CLYBL    | 2,00 | 595 | 1,88  | 625 | 1,46  | 698 |
| ZNF385B  | 1,98 | 596 | 0,76  | 711 | 1,19  | 742 |
| P2RY14   | 1,95 | 597 | 0,85  | 703 | 1,71  | 665 |
| PIK3AP1  | 1,94 | 598 | 0,85  | 704 | 1,78  | 655 |
| CXCR4    | 1,93 | 599 | 7,20  | 445 | 1,15  | 751 |
| TMC8     | 1,93 | 600 | 4,26  | 529 | 5,21  | 468 |
| SUSD4    | 1,93 | 601 | 1,24  | 670 | 1,81  | 652 |
| CRIP3    | 1,92 | 602 | 6,27  | 468 | 31,57 | 210 |
| YBX2     | 1,91 | 603 | 4,51  | 524 | 2,40  | 609 |
| KCNJ12   | 1,89 | 604 | 1,32  | 667 | 3,12  | 561 |
| FAM155B  | 1,84 | 605 | 0,11  | 766 | 3,80  | 528 |
| RTN4RL1  | 1,83 | 606 | 1,37  | 664 | 1,38  | 710 |
| RD3L     | 1,80 | 607 | 2,81  | 575 | 8,76  | 372 |

|          |      |     |       |     |        |     |
|----------|------|-----|-------|-----|--------|-----|
| FAM110D  | 1,79 | 608 | 1,00  | 689 | 4,32   | 499 |
| FXYD1    | 1,78 | 609 | 1,21  | 676 | 1,08   | 761 |
| DHRS7C   | 1,71 | 610 | 6,39  | 463 | 9,74   | 359 |
| MSI1     | 1,69 | 611 | 2,45  | 595 | 1,03   | 774 |
| SLCO5A1  | 1,67 | 612 | 0,25  | 747 | 9,44   | 362 |
| ADRA2B   | 1,66 | 613 | 0,93  | 695 | 1,70   | 666 |
| SCN2B    | 1,66 | 614 | 2,17  | 609 | 2,95   | 570 |
| GRM1     | 1,60 | 615 | 2,21  | 606 | 12,83  | 327 |
| EDNRB    | 1,58 | 616 | 7,83  | 438 | 8,33   | 383 |
| SLC26A9  | 1,57 | 617 | 2,03  | 617 | 4,41   | 494 |
| VIP      | 1,51 | 618 | 0,95  | 692 | 1,01   | 776 |
| ZBTB16   | 1,49 | 619 | 5,94  | 477 | 34,14  | 198 |
| UGT2B4   | 1,46 | 620 | 0,09  | 768 | 14,91  | 305 |
| PHACTR3  | 1,46 | 621 | 4,47  | 525 | 1,07   | 766 |
| YPEL1    | 1,46 | 622 | 6,24  | 469 | 1,26   | 731 |
| FAM107A  | 1,46 | 623 | 0,69  | 716 | 21,09  | 257 |
| DLG2     | 1,45 | 624 | 7,88  | 436 | 3,57   | 534 |
| CSF3R    | 1,45 | 625 | 0,33  | 738 | 1,39   | 709 |
| THSD7A   | 1,43 | 626 | 4,27  | 527 | 1,01   | 775 |
| IGSF5    | 1,43 | 627 | 1,62  | 638 | 1,65   | 673 |
| PDK4     | 1,42 | 628 | 17,19 | 311 | 185,18 | 60  |
| PACSIN1  | 1,41 | 629 | 0,29  | 744 | 2,07   | 633 |
| METTL11B | 1,41 | 630 | 2,49  | 592 | 1,28   | 729 |
| VWC2     | 1,40 | 631 | 2,54  | 590 | 3,73   | 529 |
| HLA-DRB1 | 1,39 | 632 | 1,62  | 639 | 28,18  | 226 |
| CHDH     | 1,38 | 633 | 1,24  | 671 | 1,40   | 704 |
| PRSS46   | 1,36 | 634 | 0,33  | 739 | 1,14   | 754 |
| FGF9     | 1,36 | 635 | 3,95  | 538 | 2,82   | 582 |
| MYO5C    | 1,36 | 636 | 3,49  | 552 | 1,10   | 759 |
| TMEM74   | 1,34 | 637 | 2,84  | 571 | 1,28   | 728 |
| C2orf71  | 1,32 | 638 | 2,25  | 603 | 5,42   | 461 |
| EPN3     | 1,32 | 639 | 4,86  | 512 | 2,24   | 623 |
| UPB1     | 1,29 | 640 | 1,39  | 661 | 1,30   | 723 |
| TREM1    | 1,27 | 641 | 0,17  | 753 | 1,26   | 732 |
| METTL24  | 1,26 | 642 | 0,76  | 710 | 1,26   | 733 |
| TPRG1    | 1,25 | 643 | 0,70  | 715 | 1,15   | 749 |
| GATA3    | 1,25 | 644 | 1,21  | 675 | 2,42   | 607 |
| CHRD2    | 1,23 | 645 | 0,47  | 728 | 13,91  | 313 |
| RERG     | 1,22 | 646 | 1,52  | 650 | 2,33   | 616 |
| TLL2     | 1,20 | 647 | 2,81  | 576 | 2,37   | 612 |
| FAM47E   | 1,19 | 648 | 2,55  | 589 | 1,70   | 668 |
| GPD1     | 1,18 | 649 | 0,46  | 729 | 2,84   | 580 |
| VWF      | 1,17 | 650 | 21,03 | 280 | 89,66  | 99  |
| TMEM139  | 1,17 | 651 | 4,65  | 517 | 1,04   | 772 |
| PLIN5    | 1,17 | 652 | 6,72  | 456 | 11,38  | 339 |
| SYT2     | 1,17 | 653 | 4,93  | 511 | 1,43   | 702 |
| RGS1     | 1,16 | 654 | 0,45  | 730 | 3,21   | 555 |

|            |      |     |      |     |        |     |
|------------|------|-----|------|-----|--------|-----|
| VIPR2      | 1,16 | 655 | 5,52 | 489 | 4,70   | 482 |
| KLHL38     | 1,15 | 656 | 5,77 | 483 | 18,57  | 274 |
| HTR4       | 1,12 | 657 | 3,87 | 540 | 2,52   | 600 |
| BCL6B      | 1,11 | 658 | 7,98 | 431 | 4,68   | 485 |
| ST8SIA5    | 1,09 | 659 | 0,52 | 727 | 1,27   | 730 |
| RNF43      | 1,09 | 660 | 2,82 | 572 | 1,74   | 661 |
| FAM151A    | 1,07 | 661 | 3,74 | 544 | 2,71   | 594 |
| SPOCK2     | 1,07 | 662 | 2,72 | 580 | 2,71   | 593 |
| SLC38A8    | 1,03 | 663 | 0,04 | 775 | 1,13   | 756 |
| ZDHHC15    | 1,02 | 664 | 1,55 | 647 | 1,17   | 745 |
| MEP1B      | 1,02 | 665 | 6,45 | 461 | 2,93   | 572 |
| CYYR1      | 1,00 | 666 | 4,79 | 513 | 11,24  | 342 |
| QRFPR      | 0,99 | 667 | 2,72 | 581 | 1,07   | 763 |
| PLXDC1     | 0,98 | 668 | 1,73 | 631 | 6,78   | 419 |
| MYH14      | 0,98 | 669 | 1,22 | 672 | 19,09  | 271 |
| DUSP8      | 0,98 | 670 | 1,01 | 687 | 4,30   | 500 |
| PZP        | 0,94 | 671 | 3,75 | 543 | 1,39   | 707 |
| CEACAM1    | 0,93 | 672 | 3,22 | 558 | 1,94   | 641 |
| MAEL       | 0,91 | 673 | 2,17 | 610 | 1,69   | 670 |
| SRGAP3     | 0,90 | 674 | 0,71 | 714 | 2,90   | 576 |
| GABRP      | 0,89 | 675 | 3,67 | 547 | 1,17   | 747 |
| SLC6A13    | 0,88 | 676 | 2,44 | 596 | 1,92   | 642 |
| C1orf168   | 0,88 | 677 | 0,86 | 702 | 4,69   | 483 |
| PDE1B      | 0,87 | 678 | 0,97 | 690 | 1,28   | 726 |
| DAND5      | 0,86 | 679 | 0,75 | 712 | 2,84   | 579 |
| RGS6       | 0,85 | 680 | 8,08 | 428 | 17,07  | 286 |
| ST6GALNAC1 | 0,82 | 681 | 0,29 | 745 | 1,36   | 714 |
| SLC15A2    | 0,80 | 682 | 1,15 | 679 | 1,65   | 674 |
| MYOM3      | 0,74 | 683 | 0,94 | 694 | 226,28 | 55  |
| IFNK       | 0,74 | 684 | 0,91 | 697 | 1,21   | 738 |
| IRX6       | 0,74 | 685 | 0,17 | 755 | 5,56   | 455 |
| SERPINA3   | 0,72 | 686 | 0,07 | 772 | 5,15   | 471 |
| ENAM       | 0,72 | 687 | 1,08 | 683 | 2,22   | 624 |
| SLC22A7    | 0,71 | 688 | 0,97 | 691 | 3,04   | 565 |
| SEMA3G     | 0,69 | 689 | 2,00 | 621 | 5,16   | 470 |
| PCP4       | 0,67 | 690 | 0,90 | 698 | 1,55   | 683 |
| POF1B      | 0,66 | 691 | 1,58 | 644 | 2,43   | 605 |
| GRIK5      | 0,65 | 692 | 0,33 | 737 | 1,15   | 748 |
| RASD2      | 0,64 | 693 | 5,56 | 488 | 1,48   | 695 |
| RNASE6     | 0,64 | 694 | 5,86 | 480 | 1,53   | 689 |
| ABCC8      | 0,64 | 695 | 0,61 | 723 | 8,59   | 376 |
| LRMP       | 0,64 | 696 | 2,10 | 613 | 1,97   | 639 |
| HEYL       | 0,63 | 697 | 4,31 | 526 | 10,33  | 351 |
| NRXN1      | 0,61 | 698 | 0,93 | 696 | 1,54   | 687 |
| CA8        | 0,60 | 699 | 1,22 | 674 | 2,51   | 601 |
| MS4A6A     | 0,59 | 700 | 2,47 | 594 | 7,59   | 402 |
| GLT1D1     | 0,58 | 701 | 0,15 | 759 | 1,04   | 771 |

|          |      |     |       |     |       |     |
|----------|------|-----|-------|-----|-------|-----|
| HFE2     | 0,57 | 702 | 0,12  | 763 | 13,65 | 317 |
| TSPAN7   | 0,57 | 703 | 1,30  | 668 | 2,52  | 599 |
| CPT1B    | 0,57 | 704 | 2,76  | 579 | 1,05  | 769 |
| PLA1A    | 0,56 | 705 | 0,25  | 748 | 1,23  | 736 |
| CILP     | 0,55 | 706 | 2,65  | 584 | 5,22  | 467 |
| GUCY2C   | 0,55 | 707 | 1,96  | 624 | 1,82  | 650 |
| GIMAP5   | 0,55 | 708 | 14,30 | 338 | 63,09 | 135 |
| LSP1     | 0,55 | 709 | 1,47  | 653 | 7,84  | 390 |
| ASB10    | 0,54 | 710 | 1,39  | 662 | 6,29  | 439 |
| KBTBD13  | 0,49 | 711 | 1,12  | 682 | 1,82  | 649 |
| PLVAP    | 0,47 | 712 | 9,21  | 407 | 2,83  | 581 |
| RORB     | 0,47 | 713 | 0,21  | 752 | 1,12  | 757 |
| KCNT1    | 0,46 | 714 | 1,00  | 688 | 1,21  | 740 |
| PEBP4    | 0,45 | 715 | 0,22  | 751 | 49,17 | 160 |
| ARHGEF15 | 0,44 | 716 | 35,00 | 202 | 52,80 | 152 |
| CYSLTR2  | 0,44 | 717 | 4,54  | 521 | 7,82  | 392 |
| FXYD2    | 0,44 | 718 | 3,15  | 559 | 1,08  | 762 |
| COL19A1  | 0,43 | 719 | 5,07  | 503 | 2,04  | 634 |
| ITK      | 0,42 | 720 | 0,23  | 749 | 1,59  | 678 |
| ALOX5    | 0,41 | 721 | 1,04  | 685 | 1,70  | 667 |
| PAQR9    | 0,40 | 722 | 0,32  | 742 | 7,77  | 395 |
| TNNT3    | 0,40 | 723 | 19,16 | 296 | 16,05 | 293 |
| STAB1    | 0,40 | 724 | 5,49  | 491 | 15,82 | 297 |
| CLEC7A   | 0,40 | 725 | 0,61  | 724 | 1,17  | 746 |
| ASB12    | 0,39 | 726 | 0,03  | 777 | 1,75  | 659 |
| KCNIP1   | 0,38 | 727 | 5,04  | 505 | 3,11  | 562 |
| ZBTB7C   | 0,38 | 728 | 0,35  | 736 | 1,03  | 773 |
| SV2B     | 0,37 | 729 | 2,33  | 601 | 7,29  | 409 |
| PRIMA1   | 0,37 | 730 | 1,17  | 678 | 1,22  | 737 |
| SMOC2    | 0,35 | 731 | 4,97  | 509 | 13,24 | 324 |
| ASB4     | 0,33 | 732 | 10,92 | 380 | 6,75  | 422 |
| TKTL1    | 0,32 | 733 | 1,78  | 629 | 2,02  | 635 |
| GLP1R    | 0,30 | 734 | 13,99 | 344 | 1,59  | 681 |
| PREX2    | 0,30 | 735 | 3,53  | 550 | 7,14  | 411 |
| NPR1     | 0,29 | 736 | 6,55  | 460 | 4,38  | 497 |
| LYZ      | 0,29 | 737 | 1,68  | 636 | 3,62  | 531 |
| GIMAP4   | 0,29 | 738 | 4,93  | 510 | 11,60 | 336 |
| TMEM252  | 0,28 | 739 | 1,35  | 665 | 1,53  | 688 |
| GABRA4   | 0,28 | 740 | 3,65  | 548 | 6,09  | 442 |
| ADRB1    | 0,27 | 741 | 0,22  | 750 | 17,97 | 281 |
| LPAR5    | 0,27 | 742 | 0,33  | 740 | 1,29  | 724 |
| AQP7     | 0,27 | 743 | 0,39  | 732 | 18,39 | 277 |
| PCLO     | 0,26 | 744 | 0,37  | 734 | 1,79  | 654 |
| CD38     | 0,25 | 745 | 1,45  | 655 | 5,62  | 453 |
| SH2D3C   | 0,20 | 746 | 7,48  | 442 | 7,98  | 389 |
| GRM8     | 0,20 | 747 | 0,10  | 767 | 1,60  | 677 |
| ABCD2    | 0,18 | 748 | 0,05  | 773 | 3,94  | 523 |

|          |      |     |      |     |       |     |
|----------|------|-----|------|-----|-------|-----|
| GIMAP6   | 0,18 | 749 | 5,24 | 502 | 13,20 | 326 |
| MFNG     | 0,18 | 750 | 1,49 | 652 | 2,77  | 588 |
| ZPBP     | 0,17 | 751 | 0,80 | 707 | 1,11  | 758 |
| CYBB     | 0,17 | 752 | 3,11 | 561 | 4,47  | 490 |
| SOX7     | 0,16 | 753 | 2,80 | 577 | 3,49  | 540 |
| PIK3CG   | 0,16 | 754 | 1,57 | 646 | 1,07  | 764 |
| PDCD1    | 0,15 | 755 | 0,05 | 774 | 1,01  | 777 |
| ASB15    | 0,14 | 756 | 1,34 | 666 | 13,65 | 318 |
| MS4A4A   | 0,13 | 757 | 1,72 | 634 | 6,43  | 433 |
| P2RX3    | 0,13 | 758 | 2,96 | 566 | 5,93  | 445 |
| KLHL6    | 0,12 | 759 | 1,20 | 677 | 1,18  | 743 |
| TCF15    | 0,12 | 760 | 1,79 | 628 | 4,56  | 487 |
| TDRD10   | 0,12 | 761 | 1,29 | 669 | 1,97  | 638 |
| CBFA2T3  | 0,11 | 762 | 0,26 | 746 | 1,53  | 690 |
| HS6ST3   | 0,11 | 763 | 0,12 | 764 | 1,56  | 682 |
| SGSM1    | 0,09 | 764 | 0,29 | 743 | 3,26  | 551 |
| KLHL34   | 0,08 | 765 | 0,14 | 761 | 1,67  | 672 |
| MOGAT1   | 0,07 | 766 | 1,04 | 686 | 1,09  | 760 |
| GIMAP8   | 0,07 | 767 | 2,25 | 605 | 16,80 | 287 |
| ADRA1A   | 0,06 | 768 | 0,52 | 726 | 42,79 | 179 |
| HLA-DOA  | 0,05 | 769 | 0,16 | 756 | 1,35  | 716 |
| DSC1     | 0,05 | 770 | 0,07 | 770 | 1,14  | 753 |
| HLA-DQB1 | 0,05 | 771 | 0,15 | 758 | 1,92  | 643 |
| TAL1     | 0,04 | 772 | 2,11 | 611 | 1,63  | 675 |
| FCGR2B   | 0,03 | 773 | 0,04 | 776 | 2,11  | 628 |
| CLEC10A  | 0,03 | 774 | 0,11 | 765 | 1,68  | 671 |
| AVPR1A   | 0,03 | 775 | 1,42 | 658 | 1,59  | 680 |
| OR51E1   | 0,02 | 776 | 0,78 | 708 | 1,31  | 722 |
| F13A1    | 0,01 | 777 | 8,08 | 429 | 25,33 | 239 |

**Supplementary Table 3: Cardiomyocyte transcriptome.** Cardiomyocyte-specific gene transcription in pluripotent stem cell-derived (embryonic) cardiomyocytes (pooled from HES2, hiPS-G1 and hiPS-CDI [iCell] cardiomyocytes; n=3/group), fetal heart (3 biopsies from single donor), and adult hearts (4 biopsies from the left ventricles of 4 non-failing hearts). Data displayed for direct comparison as RPKM and ranked by expression level.



**Supplementary Table 4: Fibroblasts transcriptome**

| Gene Symbol | Fibroblasts RPKM | Rank | Fetal Heart RPKM | Rank | Adult Heart RPKM | Rank |
|-------------|------------------|------|------------------|------|------------------|------|
| THBS1       | 23522,73         | 1    | 490,55           | 1    | 806,46           | 1    |
| LGALS1      | 3703,66          | 2    | 193,07           | 2    | 183,77           | 3    |
| S100A6      | 2439,53          | 3    | 60,68            | 9    | 138,79           | 4    |
| NT5E        | 1353,17          | 4    | 14,13            | 34   | 10,74            | 52   |
| PLAU        | 1177,94          | 5    | 15,59            | 29   | 45,20            | 11   |
| ANXA2       | 1104,48          | 6    | 117,85           | 6    | 35,17            | 13   |
| CYP1B1      | 1003,39          | 7    | 14,37            | 33   | 388,64           | 2    |
| SERPINE1    | 631,35           | 8    | 2,33             | 122  | 6,82             | 74   |
| S100A4      | 620,19           | 9    | 34,70            | 13   | 41,94            | 12   |
| ANXA1       | 593,94           | 10   | 33,27            | 15   | 18,17            | 26   |
| WNT5B       | 588,34           | 11   | 9,61             | 46   | 1,89             | 149  |
| MME         | 529,60           | 12   | 1,04             | 156  | 2,06             | 143  |
| NQO1        | 515,39           | 13   | 4,92             | 81   | 6,57             | 75   |
| CCND1       | 509,69           | 14   | 24,96            | 18   | 35,03            | 14   |
| FRMD6       | 497,35           | 15   | 16,08            | 27   | 12,31            | 48   |
| RND3        | 489,36           | 16   | 20,73            | 21   | 13,84            | 44   |
| SERPINE2    | 486,16           | 17   | 34,92            | 12   | 16,49            | 32   |
| POSTN       | 460,05           | 18   | 167,40           | 3    | 13,88            | 43   |
| FBLN1       | 450,11           | 19   | 121,04           | 5    | 108,06           | 5    |
| CTSK        | 428,50           | 20   | 4,58             | 84   | 3,35             | 107  |
| COLEC12     | 416,90           | 21   | 38,59            | 11   | 47,76            | 10   |
| SRGN        | 371,06           | 22   | 9,56             | 49   | 27,89            | 21   |
| MFAP5       | 340,78           | 23   | 7,35             | 59   | 29,42            | 18   |
| PTX3        | 323,98           | 24   | 1,85             | 129  | 1,93             | 147  |
| CD44        | 269,12           | 25   | 2,94             | 105  | 8,13             | 66   |
| MT2A        | 242,95           | 26   | 5,52             | 73   | 17,99            | 27   |
| ALDH1A3     | 221,42           | 27   | 2,18             | 125  | 8,07             | 67   |
| TNFRSF11B   | 214,04           | 28   | 0,34             | 187  | 10,34            | 55   |
| HMGA1       | 191,50           | 29   | 15,85            | 28   | 6,43             | 77   |
| IL7R        | 182,48           | 30   | 1,20             | 147  | 1,91             | 148  |
| LIMA1       | 177,15           | 31   | 15,22            | 31   | 15,03            | 38   |
| COL12A1     | 166,64           | 32   | 101,64           | 7    | 52,32            | 8    |
| HIST1H2BB   | 165,35           | 33   | 147,58           | 4    | 2,39             | 137  |
| SPHK1       | 164,24           | 34   | 4,32             | 88   | 9,69             | 60   |
| LAYN        | 162,25           | 35   | 5,78             | 71   | 5,26             | 81   |
| CRIM1       | 154,12           | 36   | 25,09            | 17   | 29,77            | 17   |
| HPCAL1      | 150,69           | 37   | 13,68            | 35   | 25,60            | 22   |
| TAGLN2      | 150,05           | 38   | 18,33            | 24   | 23,62            | 23   |
| STC2        | 139,14           | 39   | 6,77             | 67   | 1,10             | 193  |
| MMP2        | 138,29           | 40   | 33,83            | 14   | 23,44            | 24   |
| COL8A1      | 136,22           | 41   | 2,72             | 112  | 17,32            | 29   |
| ADM         | 133,07           | 42   | 2,57             | 115  | 2,87             | 125  |
| HMOX1       | 126,20           | 43   | 4,56             | 85   | 3,75             | 98   |

|          |        |    |       |     |       |     |
|----------|--------|----|-------|-----|-------|-----|
| COTL1    | 125,90 | 44 | 4,60  | 83  | 2,91  | 122 |
| PID1     | 120,25 | 45 | 20,24 | 23  | 15,91 | 36  |
| LOX      | 118,68 | 46 | 5,86  | 70  | 1,17  | 191 |
| RGMB     | 114,73 | 47 | 15,53 | 30  | 9,25  | 62  |
| AXL      | 113,53 | 48 | 7,29  | 61  | 6,47  | 76  |
| PTGS1    | 107,02 | 49 | 2,67  | 113 | 2,56  | 132 |
| PAMR1    | 102,93 | 50 | 3,01  | 103 | 3,35  | 106 |
| CLDN11   | 93,90  | 51 | 1,10  | 151 | 1,07  | 194 |
| EMP1     | 92,50  | 52 | 10,76 | 43  | 10,79 | 51  |
| LPAR1    | 92,06  | 53 | 7,29  | 60  | 3,38  | 105 |
| CD9      | 84,76  | 54 | 7,10  | 64  | 14,13 | 40  |
| GPR176   | 84,05  | 55 | 2,07  | 126 | 1,25  | 188 |
| STC1     | 81,55  | 56 | 0,69  | 171 | 3,21  | 112 |
| EDN1     | 79,58  | 57 | 4,16  | 91  | 1,59  | 164 |
| CLMP     | 79,43  | 58 | 5,34  | 77  | 2,15  | 140 |
| NBL1     | 75,91  | 59 | 5,05  | 78  | 12,74 | 46  |
| ANPEP    | 72,79  | 60 | 1,74  | 136 | 1,30  | 184 |
| DPP4     | 72,03  | 61 | 1,84  | 131 | 3,06  | 118 |
| PCOLCE   | 61,63  | 62 | 11,69 | 37  | 10,52 | 53  |
| EGFR     | 59,08  | 63 | 7,90  | 54  | 10,42 | 54  |
| SLC1A1   | 58,99  | 64 | 0,87  | 163 | 6,91  | 73  |
| F3       | 58,08  | 65 | 21,27 | 20  | 32,65 | 16  |
| FBLN5    | 53,07  | 66 | 9,42  | 51  | 16,15 | 34  |
| FGF2     | 51,44  | 67 | 5,03  | 79  | 2,42  | 136 |
| CLEC11A  | 51,04  | 68 | 5,01  | 80  | 1,43  | 178 |
| LTBP2    | 50,96  | 69 | 2,35  | 121 | 16,13 | 35  |
| TBC1D2   | 48,84  | 70 | 1,06  | 155 | 1,57  | 166 |
| MR1      | 48,42  | 71 | 2,56  | 116 | 8,69  | 64  |
| DAB2     | 48,34  | 72 | 11,04 | 42  | 15,81 | 37  |
| DCN      | 48,27  | 73 | 53,45 | 10  | 60,83 | 7   |
| SH3GL2   | 46,60  | 74 | 11,17 | 40  | 33,49 | 15  |
| CPED1    | 45,23  | 75 | 4,73  | 82  | 17,18 | 30  |
| ATP8B1   | 44,48  | 76 | 5,66  | 72  | 7,50  | 69  |
| MGLL     | 44,29  | 77 | 3,42  | 98  | 22,23 | 25  |
| NTN4     | 43,44  | 78 | 5,46  | 75  | 28,83 | 19  |
| CCBE1    | 41,52  | 79 | 0,67  | 173 | 1,05  | 196 |
| MYO10    | 41,14  | 80 | 4,47  | 87  | 3,31  | 108 |
| FAM20C   | 40,33  | 81 | 7,11  | 63  | 8,60  | 65  |
| MLPH     | 39,86  | 82 | 0,50  | 178 | 28,77 | 20  |
| CXCL1    | 38,07  | 83 | 0,99  | 158 | 1,44  | 175 |
| DRAM1    | 37,37  | 84 | 0,95  | 161 | 2,47  | 134 |
| C8orf4   | 37,37  | 85 | 7,46  | 57  | 11,27 | 50  |
| LOXL3    | 36,90  | 86 | 2,89  | 107 | 1,47  | 173 |
| ARHGAP22 | 35,90  | 87 | 0,63  | 174 | 1,82  | 153 |
| PCDH18   | 35,89  | 88 | 20,59 | 22  | 3,28  | 110 |
| LPXN     | 34,75  | 89 | 2,96  | 104 | 3,11  | 116 |
| SYTL2    | 34,51  | 90 | 14,91 | 32  | 5,69  | 80  |

|          |       |     |       |     |       |     |
|----------|-------|-----|-------|-----|-------|-----|
| HIST1H1A | 33,25 | 91  | 79,55 | 8   | 2,65  | 128 |
| VEGFC    | 33,13 | 92  | 7,62  | 55  | 4,14  | 92  |
| MYC      | 32,76 | 93  | 4,52  | 86  | 9,26  | 61  |
| ATOH8    | 31,95 | 94  | 13,30 | 36  | 13,96 | 42  |
| SLC14A1  | 31,68 | 95  | 0,91  | 162 | 5,01  | 83  |
| VASN     | 30,05 | 96  | 2,91  | 106 | 3,12  | 115 |
| ENPP2    | 26,69 | 97  | 1,61  | 141 | 2,57  | 131 |
| CPXM2    | 26,56 | 98  | 2,06  | 127 | 3,17  | 113 |
| CD109    | 25,74 | 99  | 9,51  | 50  | 4,87  | 85  |
| ADAM33   | 24,21 | 100 | 6,85  | 65  | 3,89  | 97  |
| CAMK2N1  | 24,20 | 101 | 1,39  | 143 | 3,58  | 101 |
| L1CAM    | 22,02 | 102 | 0,26  | 190 | 1,60  | 163 |
| ARSJ     | 21,90 | 103 | 1,93  | 128 | 1,02  | 199 |
| EHF      | 21,56 | 104 | 1,76  | 135 | 1,69  | 156 |
| IL6      | 21,48 | 105 | 0,13  | 194 | 1,52  | 168 |
| ADAMTS2  | 21,42 | 106 | 9,57  | 48  | 1,38  | 179 |
| SLFN5    | 21,10 | 107 | 3,35  | 100 | 5,10  | 82  |
| ARHGEF28 | 20,44 | 108 | 3,06  | 102 | 1,61  | 161 |
| ENG      | 20,24 | 109 | 18,20 | 26  | 48,11 | 9   |
| DOCK10   | 19,44 | 110 | 3,69  | 94  | 1,18  | 190 |
| SH2D4A   | 19,26 | 111 | 1,78  | 133 | 1,61  | 162 |
| FAM180A  | 18,67 | 112 | 0,35  | 185 | 9,75  | 59  |
| SLC16A4  | 18,26 | 113 | 6,56  | 68  | 2,63  | 129 |
| MRGPRF   | 17,43 | 114 | 1,22  | 146 | 1,04  | 197 |
| CTSF     | 17,04 | 115 | 7,39  | 58  | 16,18 | 33  |
| CRLF1    | 16,97 | 116 | 0,73  | 167 | 5,86  | 79  |
| ALDH3B1  | 16,69 | 117 | 3,58  | 96  | 1,47  | 172 |
| NOV      | 16,62 | 118 | 3,15  | 101 | 1,87  | 150 |
| MAMDC2   | 16,60 | 119 | 0,99  | 159 | 2,38  | 138 |
| BDNF     | 16,22 | 120 | 2,47  | 117 | 4,43  | 88  |
| RGCC     | 15,83 | 121 | 9,62  | 45  | 17,13 | 31  |
| NEK10    | 15,59 | 122 | 10,43 | 44  | 8,02  | 68  |
| SQRDL    | 15,58 | 123 | 0,41  | 183 | 2,92  | 121 |
| VGLL3    | 15,13 | 124 | 2,39  | 119 | 1,30  | 183 |
| DDX3Y    | 14,62 | 125 | 0,00  | 197 | 9,86  | 58  |
| SVEP1    | 13,14 | 126 | 3,37  | 99  | 3,66  | 99  |
| CD248    | 12,25 | 127 | 3,62  | 95  | 2,43  | 135 |
| COLEC10  | 11,78 | 128 | 0,29  | 189 | 4,90  | 84  |
| CDKN2C   | 11,72 | 129 | 7,29  | 62  | 2,91  | 123 |
| ERAP2    | 11,56 | 130 | 1,08  | 153 | 2,83  | 127 |
| ITPR3    | 11,01 | 131 | 3,82  | 93  | 3,45  | 103 |
| SLFN11   | 9,61  | 132 | 1,64  | 140 | 9,18  | 63  |
| NFASC    | 9,24  | 133 | 1,16  | 149 | 10,30 | 56  |
| SFRP4    | 8,90  | 134 | 0,68  | 172 | 1,43  | 177 |
| OSR2     | 8,77  | 135 | 0,16  | 193 | 2,09  | 142 |
| MT1X     | 8,73  | 136 | 1,74  | 137 | 14,61 | 39  |
| PRR16    | 8,28  | 137 | 3,93  | 92  | 4,12  | 93  |

|          |      |     |       |     |        |     |
|----------|------|-----|-------|-----|--------|-----|
| ALPL     | 7,63 | 138 | 0,97  | 160 | 2,99   | 120 |
| LRRN4CL  | 7,50 | 139 | 1,22  | 145 | 1,94   | 146 |
| ABCG2    | 7,39 | 140 | 2,73  | 111 | 1,33   | 182 |
| SYNE3    | 7,08 | 141 | 1,74  | 138 | 4,07   | 96  |
| BST1     | 7,01 | 142 | 2,40  | 118 | 1,02   | 200 |
| RASSF2   | 6,99 | 143 | 6,78  | 66  | 1,63   | 160 |
| ANKRD29  | 6,80 | 144 | 3,44  | 97  | 3,09   | 117 |
| DLL4     | 6,63 | 145 | 9,26  | 53  | 14,09  | 41  |
| ELN      | 6,49 | 146 | 31,57 | 16  | 10,02  | 57  |
| GPR68    | 6,43 | 147 | 1,82  | 132 | 1,66   | 158 |
| OLFML1   | 5,48 | 148 | 11,66 | 38  | 4,09   | 95  |
| NAALADL1 | 5,38 | 149 | 2,73  | 110 | 2,28   | 139 |
| PRDM1    | 5,29 | 150 | 2,36  | 120 | 1,87   | 151 |
| TRPA1    | 5,16 | 151 | 1,00  | 157 | 1,04   | 198 |
| SAMD9L   | 5,05 | 152 | 1,08  | 152 | 3,27   | 111 |
| FAM162B  | 4,85 | 153 | 2,18  | 124 | 3,17   | 114 |
| CCDC144A | 4,76 | 154 | 11,35 | 39  | 4,29   | 91  |
| ACTG2    | 4,23 | 155 | 0,69  | 170 | 1,47   | 174 |
| SHISA3   | 3,94 | 156 | 1,33  | 144 | 1,63   | 159 |
| CLEC14A  | 3,87 | 157 | 7,55  | 56  | 13,80  | 45  |
| NEGR1    | 3,60 | 158 | 1,84  | 130 | 1,44   | 176 |
| EBF3     | 3,58 | 159 | 11,10 | 41  | 3,55   | 102 |
| SPESP1   | 3,53 | 160 | 2,84  | 108 | 1,49   | 169 |
| LRRK1    | 3,52 | 161 | 1,07  | 154 | 1,20   | 189 |
| NGF      | 3,05 | 162 | 2,25  | 123 | 1,70   | 155 |
| SLC37A2  | 2,94 | 163 | 1,12  | 150 | 1,11   | 192 |
| HSPA2    | 2,92 | 164 | 2,66  | 114 | 2,84   | 126 |
| CTSS     | 2,83 | 165 | 0,72  | 168 | 2,51   | 133 |
| ZFY      | 2,80 | 166 | 0,00  | 198 | 1,36   | 180 |
| NR4A2    | 2,79 | 167 | 0,43  | 182 | 1,48   | 171 |
| ADAMTS5  | 2,78 | 168 | 2,79  | 109 | 1,86   | 152 |
| BHMT2    | 2,77 | 169 | 0,40  | 184 | 2,10   | 141 |
| TCF21    | 2,70 | 170 | 6,16  | 69  | 1,49   | 170 |
| PTGER4   | 2,57 | 171 | 0,57  | 176 | 4,32   | 90  |
| APOD     | 2,41 | 172 | 1,76  | 134 | 104,00 | 6   |
| OAS2     | 2,17 | 173 | 0,79  | 165 | 4,32   | 89  |
| LAMA3    | 2,12 | 174 | 4,21  | 90  | 2,03   | 144 |
| TDRD1    | 1,92 | 175 | 0,34  | 186 | 1,29   | 185 |
| DIO2     | 1,81 | 176 | 0,31  | 188 | 6,38   | 78  |
| CCDC36   | 1,63 | 177 | 5,51  | 74  | 1,68   | 157 |
| MKRN3    | 1,12 | 178 | 1,65  | 139 | 2,00   | 145 |
| NKAPL    | 1,11 | 179 | 1,18  | 148 | 3,30   | 109 |
| USP9Y    | 0,98 | 180 | 0,00  | 200 | 1,55   | 167 |
| MUSK     | 0,77 | 181 | 0,49  | 179 | 1,06   | 195 |
| SLCO4A1  | 0,69 | 182 | 0,19  | 191 | 3,43   | 104 |
| UTY      | 0,64 | 183 | 0,00  | 199 | 1,34   | 181 |
| ZNF662   | 0,59 | 184 | 9,60  | 47  | 2,58   | 130 |

|         |      |     |       |     |       |     |
|---------|------|-----|-------|-----|-------|-----|
| CCL11   | 0,58 | 185 | 0,17  | 192 | 4,87  | 86  |
| ADH1B   | 0,57 | 186 | 0,44  | 181 | 7,39  | 71  |
| FMO2    | 0,56 | 187 | 0,84  | 164 | 17,36 | 28  |
| GIMAP2  | 0,54 | 188 | 4,28  | 89  | 7,42  | 70  |
| CDH19   | 0,50 | 189 | 1,56  | 142 | 12,33 | 47  |
| CD34    | 0,49 | 190 | 18,26 | 25  | 12,27 | 49  |
| HLA-DMB | 0,47 | 191 | 0,71  | 169 | 3,01  | 119 |
| CLEC3B  | 0,44 | 192 | 9,29  | 52  | 4,74  | 87  |
| VIT     | 0,38 | 193 | 0,02  | 196 | 2,88  | 124 |
| CCR1    | 0,25 | 194 | 0,56  | 177 | 1,59  | 165 |
| LTF     | 0,21 | 195 | 0,45  | 180 | 1,77  | 154 |
| CSF2RB  | 0,18 | 196 | 0,76  | 166 | 1,28  | 186 |
| PRELP   | 0,16 | 197 | 0,60  | 175 | 7,08  | 72  |
| PEG3    | 0,15 | 198 | 23,85 | 19  | 4,10  | 94  |
| MEOX2   | 0,15 | 199 | 5,44  | 76  | 3,63  | 100 |
| COMP    | 0,14 | 200 | 0,02  | 195 | 1,26  | 187 |

**Supplementary Table 4: Fibroblasts transcriptome.** Fibroblast-specific gene transcription in fibroblasts (pooled from heart, skin, and gingiva derived fibroblast cultures; n=3/group), fetal heart (3 biopsies from single donor), and adult hearts (4 biopsies from the left ventricles of 4 non-failing hearts). Data displayed for direct comparison as RPKM and ranked by expression level.

**Supplementary Table 5: Gene clusters according to the trajectory of cardiomyocyte-specific gene transcription in embryonic, fetal, and adult cardiomyocytes.**

| <b>Adult CM genes</b> | <b>Embryonic CM genes</b> | <b>CM genes without directed pattern</b> |
|-----------------------|---------------------------|------------------------------------------|
| ABCC8                 | ACVR2B                    | ABCB4                                    |
| ABLIM1                | ADAMTS9                   | ABCD2                                    |
| ABLIM2                | AFAP1L2                   | ABCG1                                    |
| ACACB                 | AMT                       | ABLIM2                                   |
| ACTC1                 | APOBEC2                   | ABRA                                     |
| ACTN2                 | APOE                      | ACACB                                    |
| ADPRHL1               | ARHGAP42                  | ACE2                                     |
| ADRA1A                | ATP1B1                    | ACOT11                                   |
| ADRA2B                | B4GALNT4                  | ACSM3                                    |
| ADRB1                 | C10orf35                  | ACTA1                                    |
| ADSSL1                | C1orf105                  | ADAM11                                   |
| AK4                   | C7                        | ADAMTS8                                  |
| AKAP6                 | CADM4                     | ADCY1                                    |
| ANO5                  | CCDC3                     | ADCY5                                    |
| AQP7                  | CDKN1C                    | ADD2                                     |
| ARHGEF15              | CIB2                      | ADHFE1                                   |
| ART3                  | CLYBL                     | ADORA1                                   |
| ASB10                 | CNTN4                     | AGL                                      |
| ASB11                 | COL14A1                   | AGT                                      |
| ASB15                 | COL4A5                    | AIF1L                                    |
| ATP1A2                | COL4A6                    | ALDOC                                    |
| ATP1A3                | COL9A3                    | ALPK3                                    |
| AVPR1A                | CPT1B                     | AMY2B                                    |
| BCO2                  | CSRNP3                    | ANK2                                     |
| C10orf71              | CXADR                     | ANKRD1                                   |
| C14orf180             | CXXC4                     | APLNR                                    |
| C2orf71               | DENND5B                   | APOA1                                    |
| CA8                   | DLK1                      | APOB                                     |
| CAMK2B                | DMKN                      | APOBEC4                                  |
| CAND2                 | DSC2                      | AQP1                                     |
| CASQ2                 | DSG2                      | ARHGAP26                                 |
| CCDC69                | EBF4                      | ARHGAP4                                  |
| CD38                  | EDNRA                     | ARHGAP44                                 |
| CDK18                 | EFNA1                     | ASB12                                    |
| CES1                  | ENPEP                     | ASB2                                     |
| CKM                   | EPB41L3                   | ASB4                                     |
| CKMT2                 | EPHA3                     | ASXL3                                    |
| CLEC7A                | EPHX2                     | ATG9B                                    |
| CLGN                  | ERBB3                     | ATP1B2                                   |
| CLIC5                 | FAM184A                   | ATRNL1                                   |
| CMYA5                 | FAM84B                    | AUTS2                                    |
| COL23A1               | FTCD                      | B3GNT7                                   |

|         |           |          |
|---------|-----------|----------|
| COX6A2  | FXYD1     | B4GALNT3 |
| CPNE4   | FXYD2     | BCAM     |
| CRIP2   | FZD3      | BCL11A   |
| CRIP3   | GABRP     | BCL2L11  |
| CRYAB   | GAS7      | BCL6B    |
| CTNND2  | GATM      | BMP5     |
| CYBB    | GCA       | BMP7     |
| CYP2J2  | GRIA4     | BST2     |
| CYSLTR2 | GUCY1A3   | BVES     |
| CYYR1   | HAND1     | C11orf21 |
| DAND5   | HEPH      | C1orf105 |
| DES     | HOOK1     | C1orf168 |
| DHRS7C  | HOPX      | C6       |
| DOK7    | HRASLS    | CA14     |
| DTNA    | IGF2      | CA2      |
| DUSP27  | IGFBP2    | CA3      |
| DYSF    | IGSF3     | CACNA1H  |
| EDNRB   | ISYNA1    | CACNB2   |
| EEF1A2  | JPH1      | CADPS    |
| EFHC2   | KBTBD11   | CAMK2A   |
| ENAM    | KCNIP1    | CASQ1    |
| ESAM    | KCNJ5     | CASZ1    |
| ESRRB   | KIAA0895  | CBFA2T3  |
| F13A1   | KIAA1324L | CCDC141  |
| F5      | KRT8      | CCL21    |
| FABP3   | LAPTM4B   | CEACAM1  |
| FAM107A | LLGL2     | CELSR1   |
| FAM134B | LRRC17    | CFI      |
| FBXO40  | MAN1C1    | CGNL1    |
| FILIP1  | MDK       | CHD7     |
| GABRA4  | MERTK     | CHDH     |
| GABRB1  | METTL7A   | CHN2     |
| GIMAP4  | MMP15     | CHRD2    |
| GIMAP5  | MPP7      | CHRNA3   |
| GIMAP6  | MST1      | CILP     |
| GIMAP8  | NAP1L3    | CLEC10A  |
| GNG7    | NRK       | CMTM5    |
| GRM1    | P2RY1     | CNN1     |
| HEYL    | PCDHB12   | COBL     |
| HHATL   | PDE9A     | COL15A1  |
| HPR     | PDGFD     | COL19A1  |
| HRC     | PLBD1     | COL21A1  |
| HSPB7   | PLEKHH1   | COL9A3   |
| IFNK    | PRICKLE1  | COLEC11  |
| IGSF5   | PRKCZ     | COLQ     |
| INPP5J  | PROM1     | CORIN    |
| IRX6    | PTH1R     | CORO6    |

|           |            |          |
|-----------|------------|----------|
| ITGA7     | RAB17      | CP       |
| ITGA9     | RAB3C      | CPE      |
| ITM2A     | RAP1GAP    | CPEB3    |
| KBTBD13   | RASGEF1B   | CPNE5    |
| KCNJ11    | RASL10B    | CPVL     |
| KCNJ12    | RASL11B    | CREB5    |
| KCNJ4     | RASSF4     | CSF3R    |
| KCNQ1     | RELN       | CSRP3    |
| KCNT1     | RNF43      | CTNNA3   |
| KLHL31    | SAMSN1     | CXCR4    |
| KLHL34    | SERPINI1   | DERL3    |
| KLHL38    | SH3BGRL2   | DLG2     |
| LDB3      | SHC2       | DMD      |
| LDHD      | SLAIN1     | DNAJC5G  |
| LMOD3     | SLC40A1    | DSC1     |
| LPAR5     | SLC44A5    | DUSP13   |
| LPL       | SORCS1     | DUSP26   |
| LSP1      | SPINT2     | DUSP8    |
| MAOB      | SPOCK2     | DYNC111  |
| MB        | SPON1      | EDA      |
| MCF2L     | ST6GAL1    | EGF      |
| MFNG      | ST6GALNAC3 | EGLN3    |
| MLIP      | SYTL1      | ELF3     |
| MOGAT1    | TMC6       | ELMO1    |
| MS4A4A    | TMEM133    | ELOVL2   |
| MS4A6A    | TMEM139    | ENO3     |
| MTUS1     | TMEM176B   | EPB41L4A |
| MURC      | TMEM88     | EPHA4    |
| MYADML2   | TNNI1      | EPHA7    |
| MYBPC3    | TPD52      | EPN3     |
| MYH11     | TRIM24     | ERBB4    |
| MYH7      | TSHZ2      | ESRRG    |
| MYL2      | TSTD1      | FAM110C  |
| MYL3      | UNC13D     | FAM110D  |
| MYLK3     | VANGL2     | FAM13C   |
| MYOM1     | VCAM1      | FAM151A  |
| MYOM2     | WNT11      | FAM155B  |
| MYOM3     | ZNF853     | FAM160A1 |
| MYOZ2     | ZNRF2      | FAM189A2 |
| NCAM1     |            | FAM222A  |
| NDRG2     |            | FAM47E   |
| NEBL      |            | FAM78A   |
| NGFR      |            | FAM81A   |
| NIPSNAP3B |            | FBXL22   |
| NRAP      |            | FCGR2B   |
| NTN1      |            | FGF12    |
| OBSCN     |            | FGF18    |



OR51E1  
P2RX3  
PCLO  
PCP4  
PDE1B  
PDK4  
PGM5  
PIP5K1B  
PLIN5  
PLN  
PLXDC1  
PPARGC1B  
PPM1L  
PPP1R1C  
PPP1R3A  
PREX2  
PRIMA1  
PRKAA2  
PRSS46  
PYGM  
RAB6B  
RASGRP2  
RBFOX1  
RBPMS2  
RCAN2  
RD3L  
RGS5  
RGS6  
RNASE1  
RORB  
RRAGD  
RYS2  
SCN2B  
SCN5A  
SELP  
SEMA3G  
SFMBT2  
SGCA  
SGSM1  
SH2D3C  
SHE  
SLC25A4  
SLC26A9  
SLC2A4  
SLC35F1  
SLC4A3  
SLC5A1

FGF9  
FHIT  
FIGN  
FITM1  
FNDC5  
FRAS1  
FREM1  
FRMD4B  
FSD2  
FXD6  
GAB1  
GADD45G  
GARNL3  
GATA3  
GATA4  
GCNT2  
GCOM1  
GJA3  
GKAP1  
GLP1R  
GLT1D1  
GPD1  
GPR22  
GPRIN3  
GPX3  
GREB1  
GRIK5  
GRM8  
GUCY1B3  
GUCY2C  
HAND2  
HCN4  
HEY1  
HEY2  
HFE2  
HFM1  
HIF3A  
HLA-DOA  
HLA-DQB1  
HLA-DRB1  
HMGCS2  
HOOK1  
HP  
HRH2  
HS6ST3  
HSPB3  
HTR4

SLCO2B1  
SORBS1  
SOX7  
SPTB  
SRL  
ST8SIA5  
STAB1  
SYNPO2L  
TCF15  
TDRD10  
TECRL  
TGFB3  
THBS4  
TKTL1  
TMC8  
TMEM252  
TMEM38A  
TMOD1  
TNNI3  
TNNT1  
TRDN  
TRIM54  
TSPAN18  
TTN  
TXLNB  
USP2  
VSNL1  
VWC2  
VWF  
WBSCR17  
XIRP1  
XIRP2  
XK  
ZBTB16  
ZPBP

HTRA3  
ICA1  
IFI44L  
IGSF1  
IGSF9B  
ILDR2  
INHA  
IRX4  
ISYNA1  
ITGB1BP2  
ITIH3  
ITK  
JAG2  
JPH2  
KCNA4  
KCNH2  
KIAA0895  
KIAA1324L  
KIAA1958  
KIF26A  
KLHL3  
KLHL30  
KLHL6  
KRT8  
L3MBTL4  
LAD1  
LGI2  
LGI4  
LMOD2  
LRMP  
LRRC10  
LRRC39  
LRRTM3  
LYZ  
MAEL  
MAPK4  
MARK1  
MED12L  
MEP1B  
METTL11B  
METTL24  
MGAT3  
MGAT4A  
MLF1  
MOG  
MPPED2  
MPZL2

MSI1  
MTSS1  
MTTP  
MTUS2  
MYH14  
MYH6  
MYH7B  
MYL4  
MYL7  
MYO18B  
MYO5C  
MYOCD  
NAALAD2  
NAP1L2  
NEB  
NEURL2  
NFATC2  
NINJ2  
NKX2-5  
NMNAT3  
NPNT  
NPPA  
NPPB  
NPR1  
NR0B2  
NREP  
NRXN1  
NT5M  
NTRK1  
NUP210  
OSBP2  
P2RY14  
PACRG  
PACSIN1  
PAIP2B  
PAQR9  
PARK2  
PARM1  
PCDH7  
PCDHB14  
PCDHB15  
PCDHB5  
PDCD1  
PDE3B  
PDE4D  
PDK1  
PEBP4

PHACTR3  
PIK3AP1  
PIK3CG  
PKP2  
PLA1A  
PLCB2  
PLCL2  
PLCXD3  
PLEKHA7  
PLVAP  
PNMT  
POF1B  
POPDC2  
PPARGC1A  
PPFIA4  
PPM1K  
PPP1R12B  
PPP1R13B  
PPP1R14C  
PPP1R1A  
PPP1R9A  
PRDM16  
PRKCB  
PRKCH  
PROX1  
PRRG3  
PRSS42  
PRSS45  
PTGER3  
PTGES3L  
PTP4A3  
PTPN6  
PTPRD  
PTPRE  
PZP  
QRFPR  
RAB3IP  
RAB9B  
RALGPS1  
RALYL  
RAMP1  
RAMP2  
RAPGEF4  
RASD2  
RASGRP3  
RASSF5  
RBM20

RBM24  
RBM38  
RCOR2  
RCSD1  
REEP1  
RERG  
RGS1  
RGS16  
RIC3  
RIMKLA  
RNASE6  
RNF144A  
RNF165  
RNF207  
RRAD  
RTN4RL1  
RXRG  
S100A8  
S1PR1  
SCARF1  
SEC14L5  
SEMA5B  
SEMA6B  
SEPP1  
SERPINA3  
SERPINA5  
SH3BGR  
SIPA1L2  
SKIDA1  
SLC15A2  
SLC16A10  
SLC16A12  
SLC1A3  
SLC22A7  
SLC29A2  
SLC30A3  
SLC38A3  
SLC38A8  
SLC47A1  
SLC6A13  
SLC7A2  
SLC8A1  
SLCO5A1  
SMOC2  
SMPX  
SMTNL2  
SMYD1

SNTA1  
SOBP  
SORBS2  
SPATA25  
SPHKAP  
SPINK5  
SPINK7  
SPN  
SPSB4  
SRGAP3  
SSTR2  
ST6GALNAC1  
ST8SIA6  
STAT4  
STOX2  
SULT1C4  
SUSD4  
SV2B  
SYT17  
SYT2  
TAL1  
TBX20  
TCAP  
TESC  
TET1  
THSD7A  
TLL2  
TMEM176A  
TMEM178A  
TMEM179  
TMEM56  
TMEM71  
TMEM74  
TMEM74B  
TNFSF10  
TNNI3K  
TNNT2  
TNNT3  
TPD52L1  
TPRG1  
TREM1  
TRIL  
TRIM63  
TSPAN12  
TSPAN7  
TTC39A  
TYRP1

UGT2B4  
UNC45B  
UPB1  
VASH1  
VAV3  
VIP  
VIPR2  
VSTM2L  
VTN  
VWA7  
WNK2  
WT1  
XPO4  
YBX2  
YPEL1  
YPEL2  
ZBTB7C  
ZDHHC15  
ZMAT1  
ZNF385B  
ZNF711

**Supplementary Table 5: Gene clusters according to the trajectory of cardiomyocyte-specific gene transcription in embryonic, fetal, and adult cardiomyocytes.** Adult CM genes (progressively up in HES2-CM monolayer culture<fetal heart<adult heart), embryonic CM genes (progressively down in HES2-CM monolayer culture>fetal heart>adult heart), and CM genes without a uniform increase or decrease from embryo (HES2-CM monolayer culture) to fetal and finally adult stages.

# Supplemental Figures

## Supplementary Figure 1





**Supplementary Figure 1. Maturation of EHM constructed from defined cardiomyocyte and non-myocyte populations.** (a) Force per cardiomyocyte (CM) in undefined vs. defined EHM. (b) Actinin median fluorescence intensity (MFI) assessed by flow cytometry in cardiomyocytes isolated from undefined vs. defined EHM. (c) Inotropic response (left panel) and time-to-50%-relaxation (right panel) in undefined vs. defined EHM in response to 1  $\mu\text{mol/L}$  isoprenaline followed by 10  $\mu\text{mol/L}$  carbachol at 0.8  $\text{mmol/L}$  calcium. (d) Immunostaining of MLC2A (green), MLC2V (magenta) and nuclei (blue) in cardiomyocyte monolayer culture. Note grey appearance of double positive cells (arrows); bar: 20  $\mu\text{m}$ . (e) Quantification of MLC2A single positive (green), MLC2V single positive (magenta), and MLC2A/V double-positive (grey) cardiomyocytes before EHM generation (“input cells”) and after isolation from undefined vs. defined EHM (“output cells”). (f) Maximal FOC in undefined and defined EHM from indicated PSC lines; each label represents one EHM. (a-c) undefined (n=10) vs. defined (n=9) EHM: \*p<0.05 by two-tailed, unpaired Student’s t-test (a,b) and \*p<0.05 by 2-way repeated-measures ANOVA followed by Tukey’s multiple comparison test (c); (e) n=3-4 cell pools/group, p<0.05 by 1-way ANOVA followed by Tukey’s multiple comparison test for MLC2A/V double-positive cardiomyocytes.

Supplementary Figure 2



**Supplementary Figure 2. Expression of pluripotency associated genes and cell cycle activity in defined vs. undefined EHM.** (a) Expression of indicated pluripotency genes relative to pluripotent stem cells (HES2) in human foreskin fibroblasts (HFF), 2-week-old undefined EHM (HES2), and 2-week-old defined EHM made from purified cardiomyocytes (HES2) and HFF; n=3-6 per group, \*p<0.05 undefined EHM vs. defined EHM by two-tailed, unpaired Student's t-test. (b) Representative immunostaining of cell cycle marker Ki67 in monolayer cardiomyocytes before EHM generation ("input cells"), in 2-week-old undefined EHM, and in 2-week-old defined EHM (all HES2). Actinin (green), Ki67 (magenta), Nuclei (blue); bars: 50  $\mu$ m. (c) Quantification of Ki67<sup>+</sup> cardiomyocytes (actinin<sup>+</sup> cells) and (d) Ki67<sup>+</sup> non-myocytes (actinin<sup>-</sup> cells) in monolayer cultures before EHM generation ("input cells"), 2-week-old undefined EHM, and 2-week-old defined EHM by flow cytometry. n=3-6 per condition, \*p<0.05 by 1-way ANOVA followed by Tukey's multiple comparison test.

**Supplementary Figure 3**



|                    | Factor                        | Viability | CM actinin content | CM size | NM size | CM/NM ratio |
|--------------------|-------------------------------|-----------|--------------------|---------|---------|-------------|
| Medium supplements | B27 plus insulin 2%           | -         | o                  | -       | -       | o           |
|                    | B27 plus insulin 4%           | +         | -                  | -       | o       | -           |
|                    | B27 minus insulin 2%          | -         | -                  | -       | -       | o           |
|                    | B27 minus insulin 4%          | -         | o                  | -       | o       | o           |
| Growth factors     | TGF- $\beta$ 1 (5 ng/ml)      | o         | +                  | o       | o       | o           |
|                    | TGF- $\beta$ 2 (5 ng/ml)      | -         | -                  | +       | +       | o           |
|                    | TGF-inhibitor (100 nmol/L)    | +         | o                  | -       | -       | o           |
|                    | IGF-1 (20 ng/ml)              | +         | +                  | +       | +       | o           |
|                    | VEGF <sub>165</sub> (5 ng/ml) | o         | +                  | o       | o       | o           |
|                    | FGF-2 (10 ng/ml)              | o         | o                  | +       | o       | -           |
|                    | PDGF-BB (10 ng/ml)            | -         | o                  | +       | +       | -           |
|                    | Cardiotrophin-1 (10 ng/ml)    | -         | +                  | +       | +       | o           |
|                    | Neuregulin-1 (10 ng/ml)       | -         | o                  | +       | +       | -           |
|                    | EGF (10 ng/ml)                | +         | o                  | o       | -       | o           |



**Supplementary Figure 3. Definition of defined, serum-free EHM.** (a) Normalized force of contraction (FOC) at 2 mmol/L calcium of EHM made with rat collagen and Matrigel<sup>TM</sup> (n=12) or bovine collagen and Matrigel<sup>TM</sup> (n=14). (b) Normalized FOC at 2 mmol/L calcium of EHM made according to the Starting Protocol (n=12) and Matrix Protocol (n=9); see **Table 1** for details. (c) Normalized FOC at 2 mmol/L calcium of EHM made with bovine collagen only (0.4 mg/EHM), bovine collagen plus fibronectin (5 µg/EHM), or bovine collagen plus laminin (5 µg/EHM) as indicated; n=4/group. (d) Factorial screen in cardiac aggregate cultures: aggregates were cultured for 10 days in the presence or absence of respective factors and then analyzed by flow cytometry. Table of tested medium supplements and growth factors with a semi-quantitative analysis of viability, cardiomyocyte (CM) actinin content, CM and non-myocyte (NM) size, and CM/NM ratio. Comparison is either to serum-containing medium (Matrix Protocol) for medium supplements or control medium (αMEM with 2% B27 with insulin) without growth factor supplementation for the indicated growth factors (n=1-3 biological replicates). (e) Normalized FOC in EHM cultured for the indicated days in the presence of the indicated growth factors (GF: 100 ng/ml IGF-1 [n=10], 10 ng/ml FGF-2 [n=3], 5 ng/ml VEGF<sub>165</sub> [n=3], 5 ng/ml TGFβ1 [n=6], combination [ALL] of IGF-1, FGF-2, VEGF<sub>165</sub>, TGFβ1 [n=16]) compared to serum-free medium (Iscove's with 4% B27 plus insulin) without respective growth factor supplementation (No GF, n=6). (f) Normalized FOC in EHM cultured in 2% full B27 (n=9), 4% full B27 (n=16), 4% B27 without antioxidants (-AO, n=5), or 4% B27 without insulin (-insulin, n=6) in the presence of ALL growth factors. (g) Normalized FOC in EHM cultured in indicated basal media, Iscove's (IMDM, n=9), αMEM (n=12), RPMI (n=9), and RPMI supplemented with calcium (total free calcium ~1.2 mM, n=3) in the presence of 4% B27 and ALL growth factors as indicated in (e); numbers in square brackets indicate free calcium concentration of respective medium. (e-g) Dashed lines indicate mean (black) and SEM (grey) of normalized FOC in Matrix Protocol EHM (refer to **Table 1**); \*p<0.05 vs. Matrix Protocol EHM and §p<0.05 for indicated comparisons by 1-way ANOVA followed by Tukey's multiple comparison test.

Supplementary Figure 4

a

|            |         | Protocols           |                   |                     |
|------------|---------|---------------------|-------------------|---------------------|
| Cell lines |         | Starting, undefined | Matrix, undefined | Serum-free, defined |
| HESC       | HES2    | ■ n=8, W4           | ▣ n.d.            | □ n=24, W4 *        |
|            | H7      | ▲ n.d.              | ▴ n=3, W4         | △ n=7, W4 *         |
| iPSC       | hiPS-G1 | ● n=11, W4          | ◐ n=4, W4         | ○ n=18, W4 *        |
|            | iCell®  | ◐ n.d.              | ◑ n=4, W4         | ◒ n=10, W4 *        |



**Supplementary Figure 4. EHM protocol development.** (a) Summary of EHM constructed according to indicated protocols (details in **Table 1**) from different pluripotent stem cell lines (details in **Supplementary Table 1**). (b) Force of contraction (FOC) recorded in EHM (after 4 weeks in culture [W4]; constructed from indicated pluripotent stem cell lines; refer to **Supplementary Table 1**) under isometric conditions, electrical field-stimulation at 1.5 Hz, and increasing extracellular calcium concentrations. EHM were constructed according to the indicated protocols (**Table 1**): Starting Protocol with undefined cell composition, Matrix Protocol with undefined cell composition, Serum-free Protocol with defined cell composition (n-numbers indicated in (a); n.d.: not determined; \*p<0.05 serum-free, defined vs. serum-containing (Starting or Matrix protocol), undefined EHM by 2-way ANOVA with Tukey's multiple comparison test.

Supplementary Figure 5



**Supplementary Figure 5. Morphology of EHM-derived cardiomyocytes.** (a) Immunostaining of sarcomeric actinin (left) and myosin heavy chain (right) in 2D monolayer cardiomyocytes (top row) or EHM-derived cardiomyocytes (lower row). Graph depicts the average sarcomere size with minimal to maximal values of 2D monolayer cardiomyocytes (2D CM), Starting Protocol (SP), or Serum-free Protocol (SF) EHM-derived cardiomyocytes (EHM CM); bars: 20  $\mu\text{m}$ ; \* $p < 0.05$  by 1-way ANOVA followed by Tukey's multiple comparison test. (b) Electron micrographs of 4 week serum-free EHM (hiPS-G1); characteristic sarcomere structures, organelles, and cell-cell contacts are labelled (Mito: mitochondria, Cav: caveolae); bars: 1  $\mu\text{m}$ . (c) Immunostaining of myomesin (M-band protein), MLC2V, and n-cadherin (associated with intercalated disc) in 2D monolayer cardiomyocytes (left panels) and EHM-derived cardiomyocytes (right panels); bars: 20  $\mu\text{m}$



Supplementary Figure 6

HES2

hiPS-G1



**Supplementary Figure 6. Cellularity and dimensions of EHM during long-term culture.**

(a) Output cardiomyocyte (CM) number for HES2 (left panel) and hiPS-G1 (right panel) EHM after 2, 4, and 6/8 weeks in culture. n=12/10/3 for weeks 2/4/6 in HES2 EHM, n=4/7/6 for weeks 2/4/8 in hiPS-G1 EHM. (b) Cross sectional area (CSA) of HES2-RFP EHM (left panel) and hiPS-G1 EHM (right panel) at 2, 4, and 6/8 weeks in culture. n=12/10/8 for weeks 2/4/6 in HES2 EHM; n=7/10/8 for weeks 2/4/8 in hiPS-G1 EHM; \*p<0.05 by 1-way ANOVA followed by Tukey's multiple comparison test. (c) Absolute uncorrected FOC of HES2 EHM (left panel) and hiPS-G1 EHM (right panel) at 2, 4, and 6/8 weeks in culture. \*p<0.05 by 2-way ANOVA followed by Tukey's multiple comparison test; n=12/14/8 for weeks 2/4/6 in HES2 EHM and n=7/10/8 for weeks 2/4/8 in hiPS-G1 EHM.

Supplementary Figure 7



**Supplementary Figure 7. Cardiomyocyte maturation transcripts.** Expression of cardiomyocyte (CM) genes (according to analyses in **Figure 3a**) with a developmental trajectory (up: “adult” CM genes; down: “embryonic” CM genes) in: 22-day-old cardiomyocyte monolayer cultures (2D D22); 60-day-old cardiomyocyte monolayer cultures (2D D60); 2-week-old undefined, serum-containing EHM (EHM serum W2, Matrix Protocol); 2-week-old defined, Serum-free Protocol EHM (EHM serum-free W2); 6-week-old defined, Serum-free Protocol EHM (EHM serum-free W6); fetal and adult heart; n=3-4/group. \*p<0.05 vs. 2D D22 and §p<0.05 for indicated comparisons by 1-way ANOVA followed by Tukey’s multiple comparison test. Note that the 6 weeks EHM culture is preceded by 3 weeks of cardiomyocyte differentiation and selection; hence EHM and 2D D60 have been cultured for a similar duration under similar culture medium conditions.

Supplementary Figure 8



**Supplementary Figure 8. Adrenoceptor expression and function in EHM.** (a) RPKM of adrenoceptor subtypes: 22-day-old and 60-day-old monolayer CM culture (2D D22 and 2D D60); 2 week undefined, serum-containing EHM cultures (EHM serum W2); 2 and 6 week defined, Serum-free Protocol EHM cultures (EHM SF W2 and EHM SF W6); fetal and adult heart; n=3-4/group. \*p<0.05 vs. 2D d22 and §p<0.05 and indicated comparisons by 1-way ANOVA followed by Tukey's multiple comparison test. Note that the 6 weeks EHM culture is preceded by 3 weeks of cardiomyocyte differentiation and selection; hence EHM and 2D D60 have been cultured for a similar duration under similar culture medium conditions. (b) hiPS-G1 EHM and (c) HES2 EHM change in force of contraction (FOC) in response to 1 µmol/L isoprenaline at EC<sub>50</sub> extracellular calcium; EHM were constructed according to: (1) undefined Starting Protocol (n=11/20); (2) Matrix Protocol (n=11/32) and (3) defined, Serum-free Protocol (n=15/18); \*p<0.05 by 1-way ANOVA followed by Tukey's multiple comparison test. (d) Inotropic response of EHM to isoprenaline at 0.6 mmol/L extracellular calcium in percent of baseline force of contraction (FOC; n=11); inset: original contraction traces of unstimulated EHM (black) and after exposure to 1 µmol/L isoprenaline (red). (e) Inotropic effect of isoprenaline (100 nmol/L; n=11) alone or after 30 min pre-incubation with the specific β1-adrenoceptor antagonist (CGP-20712A, 300 nmol/L, n=7), the specific β2-adrenoceptor antagonist (ICI-118551, 50 nmol/L, n=7), or both (n=5); \*p<0.05 CGP vs. ICI by two-tailed, unpaired Student's t-test.

Supplementary Figure 9



**Supplementary Figure 9. Validation of flow cytometry-based cardiomyocyte size measurements.** (a) Panel 1: flow cytometry gating strategy for the enumeration of EHM-derived cells: total cells; panel 2: live cells (negative for SytoxRed stain); panel 3: single cells (homogenous nuclear DNA signal to exclude doublets); panel 4: RFP<sup>+</sup> cardiomyocytes vs. GFP<sup>+</sup> fibroblasts; panel 5: cardiomyocyte size analyzed by RFP median fluorescence intensity (MFI; representative distribution of cardiomyocytes from control [grey area] and NE-treated [1 μmol/L, red line] EHM); panel 6: RFP<sup>+</sup> cells stained for sarcomeric actinin after fixation to confirm cardiomyocyte identity. (b) Measurement of RFP<sup>+</sup> cardiomyocyte cell area by fluorescence microscopy; representative images of cells derived enzymatically from control EHM and EHM treated with 1 μmol/L NE for 7 days; bars: 50 μm. (c) Correlation of cardiomyocyte area measured by fluorescence microscopy and flow cytometry parameters for size approximation (FSC: forward scatter; SSC: sideward scatter, live cells and cells fixed with 70% ethanol).



## Supplementary Figure 10



**Supplementary Figure 10. Serum masks chronic catecholamine stimulation induced heart failure phenotype.** (a) Force frequency response in defined, serum-free EHM (Serum-free Protocol, n=4) and undefined, serum-containing EHM (Starting Protocol, n=4) after treatment with 1  $\mu\text{mol/L}$  norepinephrine (NE) for 7 days. \* $p < 0.05$  by 2-way repeated-measures ANOVA followed by Sidak's multiple comparison test. (b) Overview of change in force of contraction (FOC), acute isoprenaline response (ISO), and cardiomyocyte (CM) size after treatment with 1  $\mu\text{mol/L}$  NE for 7 days compared to untreated controls in undefined, serum-containing EHM (Starting Protocol, black bars, n=8) and defined, serum-free EHM (Serum-free Protocol; grey bars, n=11). \* $p < 0.05$  Starting vs. Serum-free Protocol by two-tailed, unpaired Student's t-test.

### Supplementary Figure 11



**Supplementary Figure 11. EHM patch function.** Correlation of force of contraction (FOC) and fractional area change (FAC) recorded in small EHM loops and patches from the same production runs (n=10 production runs).

## Supplemental references

1. Xu C, Police S, Rao N, Carpenter MK. Characterization and enrichment of cardiomyocytes derived from human embryonic stem cells. *Circ Res.* 2002; 91:501-508.
2. Kehat I, Kenyagin-Karsenti D, Snir M, Segev H, Amit M, Gepstein A, Livne E, Binah O, Itskovitz-Eldor J, Gepstein L. Human embryonic stem cells can differentiate into myocytes with structural and functional properties of cardiomyocytes. *J Clin Invest.* 2001; 108:407-414.
3. Mummery C, Ward-van Oostwaard D, Doevendans P, Spijker R, van den Brink S, Hassink R, van der Heyden M, Opthof T, Pera M, de la Riviere AB, Passier R, Tertoolen L. Differentiation of human embryonic stem cells to cardiomyocytes: role of coculture with visceral endoderm-like cells. *Circulation.* 2003; 107:2733-2740.
4. Passier R, Oostwaard DW, Snapper J, Kloots J, Hassink RJ, Kuijk E, Roelen B, de la Riviere AB, Mummery C. Increased cardiomyocyte differentiation from human embryonic stem cells in serum-free cultures. *Stem Cells.* 2005; 23:772-780.
5. Yang L, Soonpaa MH, Adler ED, Roepke TK, Kattman SJ, Kennedy M, Henckaerts E, Bonham K, Abbott GW, Linden RM, Field LJ, Keller GM. Human cardiovascular progenitor cells develop from a KDR+ embryonic-stem-cell-derived population. *Nature.* 2008; 453:524-528
6. Riegler J, Tiburcy M, Ebert A, Tzatzalos E, Raaz U, Abilez OJ, Shen Q, Kooreman NG, Neofytou E, Chen VC, Wang M, Meyer T, Tsao PS, Connolly AJ, Couture LA, Gold JD, Zimmermann WH, Wu JC. Human Engineered Heart Muscles Engraft and Survive Long Term in a Rodent Myocardial Infarction Model. *Circ Res.* 2015; 117:720-730.

7. Zimmermann WH, Schneiderbanger K, Schubert P, Didie M, Munzel F, Heubach JF, Kostin S, Neuhuber WL, Eschenhagen T. Tissue engineering of a differentiated cardiac muscle construct. *Circ Res.* 2002; 90:223-230.
8. Zimmermann WH, Melnychenko I, Wasmeier G, Didie M, Naito H, Nixdorff U, Hess A, Budinsky L, Brune K, Michaelis B, Dhein S, Schwoerer A, Ehmke H, Eschenhagen T. Engineered heart tissue grafts improve systolic and diastolic function in infarcted rat hearts. *Nat Med.* 2006; 12:452-458.
9. Soong PL, Tiburcy M, Zimmermann WH. Cardiac differentiation of human embryonic stem cells and their assembly into engineered heart muscle. *Curr Prot Cell Biol.* 2012;55: 23.8.1-23.8.21.
10. Tiburcy M, Meyer T, Soong PL, Zimmermann WH. Collagen-based engineered heart muscle. *Methods Mol Biol.* 2014; 1181:167-176.
11. Tiburcy M, Didie M, Boy O, Christalla P, Doker S, Naito H, Karikkineth BC, El-Armouche A, Grimm M, Nose M, Eschenhagen T, Zieseniss A, Katschinski DM, Hamdani N, Linke WA, Yin X, Mayr M, Zimmermann WH. Terminal differentiation, advanced organotypic maturation, and modeling of hypertrophic growth in engineered heart tissue. *Circ Res.* 2011; 109:1105-1114.

### **Supplemental Video Legends:**

**Supplementary Video 1:** Defined, serum-free small EHM loop (2 weeks old) on flexible holders.

**Supplementary Video 2:** High purity cardiomyocyte (CM) EHM (left) and 70:30% CM:HFH EHM (right); input cardiomyocyte were from identical cardiomyocyte pools (iCell CM; CDI).

**Supplementary Video 3:** Free floating defined, serum-free small EHM loop (4 weeks old).

**Supplementary Video 4:** Color-coded EHM on flexible holders. Sequential recordings of GFP<sup>+</sup>-fibroblasts, RFP<sup>+</sup>-cardiomyocytes, and EHM in transmitted light.

**Supplementary Video 5:** Defined, serum-free EHM patch (1.5x1.7 cm, 3 weeks old) on a 3D printed array of flexible holders.
